# Supplementary material for: Identification and Validation of a New Set of Five Genes for Prediction of Risk in Early Breast Cancer
Source: MDPI journal article supplement (doi:10.3390/ijms14059686), 2013-05-06
Supplement: s1 [file s1]

## Sheet:  Tutti Casi Lavoro
ID	SET	RNA concentration	B2M	bACTIN	FBX031	FGF18	BCL2	IGFBP7	IDE	AYTL2	ORC6L	MS4A7	OSOX2	PITRM1	TGFb3	PRC1-201	GPR180	MMP9	IGFBP6	IRS1	IL6ST210	IGF1	TNSF	SERF1A	Birth date	Age	Date Surgery	Histotype	HistoTypeCode	Tgroups	TGroupCode	T max	N examined	N° N+	Ngroups	NGroupCode	M1	RE	%ER	PgR	%PR	Grading	Ki-67	Ki67 Nr	Ki67 Groups SG	Ki67GroupCodeSG	Ki 3Group	Her2%cell	p53
1	Training	(219ng/ul)	24.16	26.74	31.53	34.79	31.87	26.38	32.13	32.85	34.09	29.87	34.09	31.11	30.57	33.34	31.68	31.41	31.83	29.85	28.71	33.68	31.97	32.5	1923-12-01	74.3973	1998-03-16	lobular	2	T2	2	26	12	2	pN1a	1		1	95	1	80	2	0.1	10	Low	1	Low	X	0
2	Training	(414ng/ul)	23.01	24.24	29.95	39.84	31.14	25.09	30.7	31.92	31.02	29.62	32.84	29.27	29.26	30.65	30.65	32.13	32.89	26.77	26.5	34.75	30.66	31.08	1930-07-06	67.8	1997-12-04	ductal	1	T2	2	25	13	0	pN0	0		1	90	1	50	3	0	0	Low	1	Low	X	0
3	Training	(324ng/ul)	25.08	26.84	31.52	37.89	30.9	26.32	32.02	33.82	33	30.01	35.26	31.21	31.11	33.04	31.48	35.11	33.29	27.65	28.63	34.77	31.94	32.74	1919-06-23	78.9479	1998-04-09	ductal	1	T2	2	22	14	0	pN0	0		2	NEG	2	NEG	3	0.35	35	High	3	High	X	0
4	Training	(111ng/ul)	21.98	23.22	25.55	23.4	25.66	23.18	26.63	27.09	27.75	25.27	31.13	25.84	25.14	26.74	25.84	28.67	22.95	24.84	23.58	18.73	27.8	38.95	1921-05-07	77.4082	1998-09-14	mucinous		T1	1	5	X	0	pN0	0		1	80	2	NEG	X	0.05	5	Low	1	Low	X	0
5	Training	(282ng/ul)	22.05	22.08	25.95	21.6	27.37	21.93	27.27	27.64	26.39	27.11	28.99	25.67	26.07	27.28	25.76	25.92	26.72	24.99	24.68	27.85	27.53	26.81	1927-12-21	70.3781	1998-03-12	ductal	1	T2	2	22	8	0	pN0	0		2	NEG	2	NEG	3	0.4	40	High	3	High	X	0
6	Training	(194ng/ul)	27.11	29.35	25.74	29.92	29.64	31.52	30.43	27.64	28.69	31.39	28.86	30.3	31.31	30.1	24.78	28.31	32.84	29.53	31.97	31.09	24.46	22.12	1924-09-06	73.5014	1998-01-12	lobular	2	T1	1	18	11	0	pN0	0		1	95	1	20	X	0.1	10	Low	1	Low	X	0
7	Training	(271ng/ul)	33.49	31.54	30.96	33.14	31.88	31.84	33.22	31.7	31.99	34.62	30.11	33.02	33.73	32.53	26.91	30.9	45	32.21	33.42	33.4	27.06	23.75	1917-02-13	81.2466	1998-03-26	ductal	1	T2	2	30	10	1	pN1a	1		1	90	1	80	2	0.05	5	Low	1	Low	X	0
8	Training	(255ng/ul)	25.08	26.84	31.52	37.89	31.75	26.32	32.02	33.82	33	30.01	34.72	31.21	31.11	33.04	31.48	35.11	33.29	27.65	28.63	34.77	31.94	32.74	1933-04-19	65.6082	1998-10-19	ductal	1	T1	1	20	13	0	pN0	0		1	80	1	90	2	0.1	10	Low	1	Low	X	0
9	Training	(695ng/ul)	22.82	26.29	31.54	45	33.85	26.41	31.56	32.58	29.44	32.45	33.29	29.7	33.57	32.26	29.51	29.88	34.2	31.69	30.38	34.95	32.83	33.81	1921-01-23	77.411	1998-05-04	ductal	1	T2	2	30	25	0	pN0	0		2	NEG	1	20	3	0.2	20	High	3	Intermediate	X	0
10	Training	(139ng/ul)	25.48	26.97	31.63	35.31	31.18	26.62	31.7	35.28	32.56	31.6	35.64	31.18	31.68	33.97	31.24	32.11	34.1	27.86	29.9	36.57	32.72	32.17	1917-08-13	80.7452	1998-02-26	mucinous		T1	1	18	21	0	pN0	0		1	90	1	90	X	0.15	15	High	3	Intermediate	X	0
11	Training	(461ng/ul)	24.86	27.05	32.44	45	33.61	26.96	33.14	32.64	32.91	33.8	39.68	32.41	31.63	32.86	32.47	34.85	32.46	28.02	29.18	45	33.65	33.39	1937-10-28	60.5644	1998-04-08	lobular	2	T1	1	20	10	5	pN2	2		1	80	1	60	X	0	0	Low	1	Low	X	0
12	Training	(105ng/ul)	24.4	27.66	32.7	45	31.89	26.82	32.15	34.89	32.47	31.36	45	31.74	31.45	32.42	33.34	34	33.58	30.68	28.49	35.88	34	33.13	1922-08-30	75.5068	1997-11-28	ductal	1	T2	2	23	25	0	pN0	0		1	75	2	NEG	2	0	0	Low	1	Low	X	0
13	Training	(220ng/ul)	20.1	20.53	28.82	33.9	29.83	21.6	27.06	30.88	31.52	24.64	37.19	29	27.2	32.38	28.44	32.09	13.51	25.64	23.89	36.05	27.89	28.65	1927-02-16	71.8027	1998-10-19	ductal	1	T1	1	20	14	0	pN0	0		1	90	2	NEG	2	0.3	30	High	3	High	X	0
14	Training	(347ng/ul)	24.46	26.4	32.49	45	31.16	27.1	33.6	33.16	30.96	34.31	33.78	31.37	31.76	31.08	31.5	31.22	33.36	30.8	32.24	35.98	33.63	32.74	1943-06-26	54.9315	1998-04-20	ductal	1	T1	1	15	22	0	pN0	0		2	NEG	2	NEG	3	0.8	80	High	3	High	X	0
15	Training	(280ng/ul)	23.83	28.34	31.25	33.32	30.9	26.97	31.79	33.64	32.93	30.92	33.59	31.99	32.02	32.85	31.99	33.32	32.81	29.07	30.61	33.23	32.74	32.91	1922-10-26	75.3068	1998-01-02	ductal	1	T1	1	18	11	0	pN0	0		1	90	0	NA	2	0.1	10	Low	1	Low	X	0
16	Training	(521ng/ul)	26.19	27.94	34.08	38.36	33.17	27.81	34.21	35.07	32.07	31.4	34.96	33.25	31.81	33.54	35.23	34.13	33.96	29.22	29.15	45	34.86	33.36	1944-04-08	53.8438	1997-12-15	ductal	1	T1	1	15	10	2	pN1a	1		1	95	1	50	1	0.1	10	Low	1	Low	X	0
17	Training	(712ng/ul)	23.28	24.86	30.16	45	33.28	24.57	30.75	31.87	30.59	29.63	33.34	30.06	30.12	31.05	30.54	32.79	32.78	28.06	26.91	37.34	30.52	31.52	1943-02-27	54.9699	1998-01-19	ductal	1	T1	1	18	14	1	pN1a	1		1	90	0	NA	2	0.15	15	High	3	Intermediate	X	0
18	Training	(245ng/ul)	26.55	29.52	33.21	45	35.32	28.99	36.64	35.55	34.08	33.55	45	34.3	33.37	36.54	34.06	38.43	45	31.21	29.79	45	34.23	35.75	1928-01-21	70.3699	1998-04-23	ductal	1	T1	1	15	21	0	pN0	0		1	90	2	NEG	2	0.15	15	High	3	Intermediate	X	0
19	Training	(274ng/ul)	24.07	26.96	31.12	36.16	32.25	26.3	33.29	34.44	34.29	32.77	36.18	31.68	30.46	34.82	32.98	26.71	32.44	28.05	28.57	34.76	33.8	32.36	1953-05-25	44.8384	1998-02-23	ductal	1	T1	1	15	33	0	pN0	0		1	30	1	60	1	0.05	5	Low	1	Low	X	0
20	Training	(153ng/ul)	25.6	27.94	31.27	34.94	32.63	26.88	33.37	33.41	30.3	32.31	34.61	32.6	30.46	35.23	32.28	36.81	32.75	29.68	28.87	35.44	45	33.29	1934-04-02	64.2932	1998-05-13	tubulo-lobular		T1	1	11	21	0	pN0	0		1	95	1	80	X	0.15	15	High	3	Intermediate	X	0
21	Training	(47ng/ul)	24.7	26.52	30.96	45	30.52	26.9	32.45	32.65	30.95	33.12	36.08	33.65	31.35	33.86	32.21	27.53	31.19	27.36	30.47	34.17	33.92	32.48	1932-02-07	66.2356	1998-03-25	ductal	1	T1	1	4	10	0	pN0	0		1	90	1	80	X	0.08	8	Low	1	Low	X	0
22	Training	(426ng/ul)	24.93	25.61	30.58	37.05	31.38	25.49	31.42	30.67	31.5	29.16	33.43	30.85	30.2	31.6	31.32	30.1	33.02	27.78	29.03	35.24	30.55	32.23	1922-07-15	75.9808	1998-05-25	ductal	1	T2	2	21	30	0	pN0	0		1	80	1	40	2	0.15	15	High	3	Intermediate	X	0
23	Training	(379ng/ul)	23.92	27.62	31.93	45	34.72	26.59	35.13	34.59	33.03	32.12	35.74	31.89	31.77	34.93	32.55	34.14	34.73	31.02	35.23	36.29	33.8	32.64	1950-10-22	47.6658	1998-05-20	ductal	1	T2	2	35	34	12	pN3	3		1	40	2	NEG	2	0.5	50	High	3	High	X	0
24	Training	(138ng/ul)	22.72	23.55	28.85	32.98	29.49	23.59	29.11	30.72	29.64	28.58	32.59	28.99	27.68	31.3	29.19	30.58	30.27	26.15	27.73	32.02	28.64	29.49	1930-03-26	67.8877	1997-11-11	tubulo-lobular		T2	2	22	15	0	pN0	0		1	90	1	50	X	0.2	20	High	3	Intermediate	X	0
25	Training	(461ng/ul)	23.48	26.17	30.44	35.52	31.43	26.6	30.8	33.9	32.33	29.19	36.78	32.71	30.84	34.61	32.86	34.17	37	28.35	30.23	45	31.9	33	1916-12-15	81.4986	1998-04-01	ductal	1	T1	1	18	9	0	pN0	0		1	70	1	50	2	0.1	10	Low	1	Low	X	0
26	Training	(155ng/ul)	24.51	27.19	31.33	35.15	31.86	26.47	32.67	34.45	32.91	33.22	38.65	31.81	32.02	35.83	32.24	32.27	34.87	29.39	30.95	35.98	35.28	33.29	1921-04-13	77.0411	1998-03-12	ductal	1	T1	1	18	X	N2	pN2	2		1	90	2	NEG	2	1	100	High	3	High	X	0
27	Training	(463ng/ul)	25.33	26.31	31.32	34.87	33.62	25.7	32.47	34.15	33.85	31.12	36.63	31.05	29.47	34.7	31.63	33.81	32.98	30.43	29.39	34.46	32.41	32.93	1955-10-30	42.2712	1997-12-18	tubulo-lobular		T1	1	18	28	1	pN1a	1		1	50	1	90	1	0.1	10	Low	1	Low	X	0
28	Training	(NAng/ul)	25.57	29.17	33.21	36.24	35.11	28.64	35.75	35.81	33.16	34.49	45	34.39	32.87	34.67	38.24	33.76	34.39	34.26	32.08	37.04	35.47	35.76	1922-03-18	76.3014	1998-05-07	ductal	1	T2	2	24	10	0	pN0	0		1	80	1	35	3	0.1	10	Low	1	Low	X	0
29	Training	(158ng/ul)	24.15	26.64	31.15	34.97	33.91	26.27	31.46	33.16	33.59	29.66	34.81	31.08	28.83	32.35	31.43	32.25	31.84	28.92	28.99	33.31	30.98	32.26	1920-08-10	78.5014	1998-12-18	lobular	2	T1	1	13	10	0	pN0	0		1	85	2	NEG	2	0.15	15	High	3	Intermediate	X	0
30	Training	(281ng/ul)	22.44	24.68	30.56	34.75	31.83	25.54	32.14	32.83	29.31	30.53	34.09	30.25	30.28	31.03	30.88	31.91	33.7	29.86	28.85	36.38	33.95	33.39	1957-08-15	41.9616	1999-07-07	ductal	1	T3	3	60	10	10	pN2	2		2	NEG	2	NEG	3	0.4	40	High	3	High	X	0
31	Training	(187ng/ul)	24.98	29.06	31.77	45	33.31	29.67	32.12	45	30.12	32.36	36.38	30.79	33.77	33.19	30.89	33.62	45	31.56	29.65	45	35.71	34.05	1928-10-25	70.8603	1999-07-01	tubular		T1	1	15	35	0	pN0	0		1	95	1	70	1	0.25	25	High	3	Intermediate	X	0
32	Training	(418ng/ul)	23.16	25.11	30.02	45	32.39	25.66	30.66	33.32	29.18	30.4	34.55	30.41	30.05	31.03	30.75	31.01	32.67	29.65	29.91	34.68	31.17	31.71	1947-02-07	52.4301	1999-05-21	medullary		T2	2	24	24	0	pN0	0		2	NEG	2	NEG	X	0.9	90	High	3	High	X	0
33	Training	(373ng/ul)	24.58	26.48	31.28	35.03	32.64	26.23	33.44	33.31	34.53	31.25	35.42	32.44	30.52	33.67	31.97	35.17	33.01	29.94	28.73	35.45	32.37	32.28	1941-11-03	57.674	1999-05-28	lobular	2	T1	1	20	10	0	pN0	0		2	NEG	1	50	X	0.3	30	High	3	High	X	0
34	Training	(169ng/ul)	23.81	24.58	30.15	35.21	30.98	25.4	30.76	31.45	33.12	28.99	33.68	30.34	28.47	33.11	31.11	33.12	30.28	28.23	27.63	32.96	30.87	31.49	1948-02-09	51.4247	1999-06-02	ductal	1	T1	1	7	14	0	pN0	0		1	70	1	25	2	0.1	10	Low	1	Low	X	0
35	Training	(150ng/ul)	24.42	25.84	30.42	45	31.56	26.89	31.99	33.08	33.63	28.53	35.27	31.49	30.14	33.46	32.46	30.83	34.22	29.73	29.95	35.73	33.89	32.26	1933-07-02	66.1918	1999-07-12	ductal	1	T1	1	10	12	0	pN0	0		1	90	1	60	3	0.1	10	Low	1	Low	X	0
36	Training	(239ng/ul)	23.55	28.1	32.33	45	34.57	27.04	33.77	35.49	32.58	32.57	45	32.94	31.72	34.29	34.05	31.23	34.89	32.51	31.95	35.83	33.85	36.25	1925-06-23	74.1315	1999-07-23	ductal	1	T1	1	17	31	12	pN3	3	1	2	NEG	2	NEG	3	0.25	25	High	3	Intermediate	X	0
37	Training	(267ng/ul)	22.01	24.17	29.14	34.9	32.39	25.09	30	32.87	29.84	30.78	33.91	29.23	30.62	31.14	30.22	33.35	32.8	30.46	30.18	35.06	30.64	32.09	1923-01-26	76.5945	1999-07-01	ductal	1	T2	2	25	17	0	pN0	0		1	95	1	95	2	0.1	10	Low	1	Low	X	0
38	Training	(457ng/ul)	25.86	27.62	33.47	45	33.69	26.59	33.17	34.01	34.17	32.63	36.71	31.95	30.59	34.13	33.02	34.87	33.36	29.43	29.2	36.79	34.48	34.28	1951-05-09	47.1397	1998-05-21	lobular	2	T2	2	38	29	0	pN0	0		1	90	1	70	1	0.1	10	Low	1	Low	X	0
39	Training	(310ng/ul)	24.4	27.04	32.48	36.26	31.86	26.33	32.32	38.21	33.85	29.15	45	31.44	31.86	35.66	34.02	35.18	34.98	28.26	29.01	35.74	31.32	32.84	1922-09-24	75.4493	1998-01-22	ductal	1	T2	2	40	13	0	pN0	0		1	60	1	25	2	0.05	5	Low	1	Low	X	0
40	Training	(269ng/ul)	25.91	27.78	32.5	37.39	34.59	26.78	32.94	35.43	33.89	32.75	35.54	32.72	30.56	33.05	33.24	32.46	33.25	30.31	28.97	37.47	32.99	33.61	1939-09-29	58.737	1998-06-10	tubulo-lobular		T2	2	30	33	2	pN1a	1		1	80	1	70	1	0.1	10	Low	1	Low	X	0
41	Training	(257ng/ul)	27.5	31.12	33.12	45	34.79	29.31	34.83	38.02	35.13	34.51	45	35.19	34.48	45	37.25	35.09	36.67	32.4	30.71	45	45	34.1	1935-04-01	63.274	1998-05-08	ductal	1	T2	2	22	9	0	pN0	0		1	95	1	90	2	0.05	5	Low	1	Low	X	0
42	Training	(633ng/ul)	23.8	25.16	29.11	36.9	30.79	25.56	30.72	32.85	28.92	30.95	32.89	29.22	31.06	29.5	29.38	32.75	34.05	30.11	29.95	34.61	32.16	31.78	1934-08-07	63.5178	1997-12-22	ductal	1	T2	2	22	30	0	pN0	0		2	NEG	2	NEG	X	0.05	5	Low	1	Low	X	0
43	Training	(221ng/ul)	45	45	45	45	45	45	45	45	45	45	45	45	45	45	45	45	45	45	45	45	45	45	1933-05-21	65.6521	1998-11-20	ductal	1	T2	2	25	19	0	pN0	0		1	80	1	40	2	0.05	5	Low	1	Low	X	0
44	Training	(711ng/ul)	25.8	28.04	32.14	45	32.45	27.83	33.3	34.43	32.11	30.71	35.67	31.62	31.88	31.85	33.83	35.57	34.05	35	30.25	29.71	35.7	34.1	1936-01-06	62.5479	1998-06-10	lobular	2	T1	1	19	30	0	pN0	0		1	90	1	80	1	0.1	10	Low	1	Low	X	0
45	Training	(309ng/ul)	23.64	26.06	31.22	45	31.52	27.78	31.9	31.7	32.79	26.96	33.82	32.11	31.78	31.89	31.31	32.11	34.57	27.53	27.9	36.45	31.61	31.96	1925-02-06	73.5014	1998-06-04	mucinous		T3	3	80	7	0	pN0	0		1	90	1	80	X	0.15	15	High	3	Intermediate	X	0
46	Training	(264ng/ul)	26.74	28.2	33.58	45	34.39	27.72	34	34.46	33.54	32.3	45	33.51	31.83	34.69	33.54	38.24	33.33	30.98	29.97	45	34.45	35.07	1933-02-22	65.3808	1998-05-25	lobular	2	T1	1	17	34	2	pN1a	1		1	70	1	80	1	0.05	5	Low	1	Low	X	0
47	Training	(53ng/ul)	23.31	26.36	31.93	45	31.29	26.33	32.32	33.27	31.77	30.36	34.29	30.96	31.64	31.03	30.77	31.27	32.71	29.58	28.16	36.84	32.26	32.56	1943-07-26	54.6192	1998-01-22	ductal	1	T2	2	21	19	1	pN1a	1		1	85	1	30	X	0.35	35	High	3	High	X	0
48	Training	(235ng/ul)	25.05	28.01	35.58	45	36.02	27.87	34.55	35.01	34.24	32.92	36.7	33.5	31.9	33.04	32.97	33.01	36.06	31.56	29.61	45	38.13	45	1957-09-21	40.6082	1998-04-21	ductal	1	T2	2	25	34	23	pN3	3	1	1	80	2	20	3	0.2	20	High	3	Intermediate	X	0
49	Training	(50ng/ul)	25.34	27.69	30.38	45	31.32	26.34	33.44	33.9	33.69	31	34.77	32.37	31.47	34.24	32.32	36.06	35.01	30.25	29.06	45	32.62	32.61	1926-12-04	71.2767	1998-02-03	mucinous		T1	1	10	16	0	pN0	0		1	90	1	30	1	0.05	5	Low	1	Low	X	0
50	Training	(179ng/ul)	27.67	32.35	36.21	45	45	30.09	45	36.73	32.92	31.73	45	37.02	35.7	36.35	34.33	45	38.98	32.59	32.85	45	38.91	45	1929-09-20	68.3589	1997-11-14	ductal	1	T2	2	32	19	0	pN0	0		1	50	1	50	X	0.2	20	High	3	Intermediate	X	0
51	Training	(276ng/ul)	24.09	26.76	31.45	35.67	33.07	26.13	32.05	32.76	32.64	30.85	36.24	31.08	30.02	33.02	31.13	33.13	34.51	29.8	30.11	36.52	33.04	32.24	1935-04-12	62.9699	1998-02-09	lobular	2	T2	2	27	20	0	pN0	0		1	30	1	30	1	0.1	10	Low	1	Low	X	0
52	Training	(366ng/ul)	24.19	27.29	31.99	45	34.4	27.6	34.4	34.46	30.98	30.83	34.57	32.44	32.62	31.4	34	32.69	34.81	33.05	31.87	45	33.46	32.63	1925-02-13	73.1589	1998-03-03	ductal	1	T1	1	14	25	0	pN0	0		2	NEG	2	NEG	3	0.25	25	High	3	Intermediate	X	0
53	Training	(192ng/ul)	24.06	25.21	29.46	36.08	30.26	25.84	31.08	32.17	31.3	29.48	34	30.82	29.66	32.27	31.97	33.02	31.73	26.85	27.36	34.6	32.18	32.25	1926-01-08	73.9781	1999-11-08	ductal	1	T1	1	6	7	0	pN0	0		1	90	1	90	1	0.15	15	High	3	Intermediate	X	0
54	Training	(392ng/ul)	23.51	26.65	31.15	45	31.97	26.27	32.06	33.5	33.63	30.39	34.21	31.75	30.66	34.16	32.47	33.49	32.7	28.2	28.72	35.51	32.84	32.59	1950-08-02	49.0027	1999-06-18	ductal	1	T1	1	12	13	0	pN0	0		1	90	1	20	2	0.15	15	High	3	Intermediate	X	0
55	Training	(288ng/ul)	22.29	24.25	29.45	36.49	30.6	24.93	30.16	32	32.31	27.69	34.71	29.45	28.15	32.16	30.46	31.43	31.15	26.9	27.37	34.82	29.41	31.22	1932-09-20	66.8822	1999-06-29	ductal	1	T1	1	15	23	11	pN3	3		2	NEG	2	NEG	3	0.9	90	High	3	High	X	0
56	Training	(291ng/ul)	22.16	25.09	29.33	45	31.85	25.71	32.03	32.35	30.1	30.59	34.21	29.89	30.78	31.1	29.79	28.18	31.71	29.37	28.85	36.82	28.41	32.56	1955-10-28	43.9123	1999-08-25	ductal	1	T1	1	17	53	44	pN3	3		2	NEG	2	NEG	3	0.7	70	High	3	High	X	0
57	Training	(399ng/ul)	24.92	25.92	31.61	45	32.31	26.5	31.68	33.54	32.18	31.06	36.7	30.84	31.04	33.45	31.18	33.18	34.3	27.95	29.83	45	31.94	33.09	1921-12-27	77.6548	1999-08-04	NOS		T2	2	35	17	0	pN0	0		1	80	2	NEG	X	0.25	25	High	3	Intermediate	X	0
58	Training	(328ng/ul)	23.16	25.77	29.77	34.81	32.09	25.03	31.6	33.19	31.72	30.52	35.99	30.41	29.28	32.98	30.98	32.85	31.47	28.93	28.49	34.58	31.16	33.33	1940-05-28	59.2603	1999-07-13	ductal	1	T1	1	20	26	0	pN0	0		2	NEG	2	NEG	3	0.2	20	High	3	Intermediate	X	0
59	Training	(751ng/ul)	22.67	26.75	31.59	45	33.21	26.82	32.17	33.84	29.02	29.79	33.62	30.59	32.54	31.26	30.87	30.01	34.76	29.42	32.54	34.27	31.78	33.4	1939-08-17	59.9644	2000-01-03	NOS		X	4	X	16	2	pN1a	1		2	NEG	2	NEG	3	0	0	Low	1	Low	X	0
60	Training	(461ng/ul)	24.14	27.11	31.17	45	33.47	26.64	33.44	33.61	30.19	31.53	35.56	32.25	32.86	31.75	31.15	31.23	33.94	31.03	30.26	35.33	34.86	32.54	1931-04-20	68.3616	1999-08-13	ductal	1	T2	2	40	4	4	pN2	2		2	NEG	2	NEG	3	0.8	80	High	3	High	X	0
61	Training	(599ng/ul)	22.49	24.59	29.32	35.23	30.95	24.3	30.81	32.41	31.21	30.09	35.83	30.24	28.42	33.6	30.87	32.31	31.12	28.61	27.12	36.42	30.81	31.59	1957-02-10	42.3397	1999-05-05	lobular	2	T1	1	4	26	4	pN2	2		1	80	1	85	X	0.15	15	High	3	Intermediate	X	0
62	Training	(826ng/ul)	23.54	24.41	30.39	34.53	31.6	24.77	32.23	30.15	31.27	32.47	32.9	30.05	29.87	31.88	30.18	35.33	32.02	28.85	27.16	34.37	28.45	31.82	1918-08-12	81.3808	1999-11-08	ductal	1	T2	2	35	0	X	X	4		1	80	2	NEG	1	0.2	20	High	3	Intermediate	X	0
63	Training	(798ng/ul)	24.4	27.19	30.94	45	32.85	26.7	32.75	34.28	33.36	30.76	34.63	31.61	31.82	33.23	31.37	34.28	35.05	28.04	29.37	36.17	34.22	33.67	1943-04-18	56.6411	1999-10-15	ductal	1	T1	1	15	17	0	pN0	0		1	85	1	70	2	0.1	10	Low	1	Low	X	0
64	Training	(610ng/ul)	26.06	28.95	31.97	45	32.77	28.01	34.98	36.23	33.35	31.69	37.23	32.58	31.49	34.44	33.74	34.36	34.33	29.17	28.47	35.49	33.88	33.02	1929-02-28	70.7452	1999-09-08	ductal	1	T2	2	24	25	0	pN0	0		1	20	1	70	2	0.1	10	Low	1	Low	X	0
65	Training	(239ng/ul)	25.72	28.96	33.2	45	35.15	28.05	36	37.15	35.56	30.83	45	32.46	33.38	38.29	33.55	35.84	36.65	30.99	31.13	45	34.39	35.88	1948-04-26	51.6164	1999-10-29	ductal	1	T1	1	20	11	4	pN2	2		1	70	1	80	3	0.3	30	High	3	High	X	0
66	Training	(166ng/ul)	23.46	25.97	30.89	35.42	32.46	25.89	32.58	32.99	29.57	30.43	34.47	30.7	30.61	32.56	31.75	32.3	33.97	29.25	28.53	45	32.53	32.74	1948-02-14	51.6329	1999-07-15	ductal	1	T1	1	20	18	8	pN2	2		1	60	1	60	3	0.6	60	High	3	High	X	0
67	Training	(337ng/ul)	25.35	27.46	31.84	45	33.2	27.2	32.97	35.6	32.86	30.86	35.76	31.06	30.76	35.01	32.65	27.62	32.98	29.44	29.33	38.59	33.03	45	1950-05-23	49.5425	1999-11-11	tubular		T1	1	13	16	0	pN0	0		2	NEG	1	80	1	0.1	10	Low	1	Low	X	0
68	Training	(443ng/ul)	23.29	24.14	30.59	34.73	30.06	24.52	30.26	32	32.4	26.92	34.34	30.35	28.76	32.36	30.5	32.92	31.55	27.18	27.64	33.21	28.71	30.4	1918-01-14	81.5288	1999-07-06	lobular	2	T2	2	30	12	0	pN0	0		1	90	1	20	X	0.1	10	Low	1	Low	X	0
69	Training	(307ng/ul)	23.85	25.88	29.83	35.99	31.45	25.32	31.63	32.86	31.33	30	34.69	30.55	29.75	31.82	32.15	33.58	32.14	28.78	28.35	35.24	33.44	31.27	1947-12-24	51.7644	1999-08-23	lobular	2	T1	1	18	23	7	pN2	2		1	90	1	70	1	0.05	5	Low	1	Low	X	0
70	Training	(714ng/ul)	22.34	24.07	31.01	36.59	32.52	25.38	31.56	31.9	30.89	30.33	33.63	29.88	29.02	30.4	30.38	31.76	32.86	28.42	27.8	36.2	29.92	31.05	1950-11-30	48.8055	1999-08-12	ductal	1	T1	1	19	19	0	pN0	0		1	55	1	30	2	0.35	35	High	3	High	X	0
71	Training	(157ng/ul)	23.57	24.14	29.54	34.8	30.84	25.62	31.14	32.52	32.22	28.52	33.96	29.52	28.47	31.14	31.6	33.05	32.32	28.17	28.29	37.13	32.75	30.83	1947-07-21	52.189	1999-08-26	tubulo-lobular		T1	1	10	7	0	pN0	0		1	65	1	70	1	0.1	10	Low	1	Low	X	0
72	Training	(178ng/ul)	24.21	25.27	30.28	39.19	32.25	25.56	31.52	33.18	33.2	31.24	35.15	30.51	28.67	32.54	32.06	32.76	31.24	29.33	29.1	37.11	32.14	32.21	1943-07-18	56.4658	1999-11-11	ductal	1	T1	1	5	9	0	pN0	0		1	80	1	80	1	0.1	10	Low	1	Low	X	0
73	Training	(661ng/ul)	24.05	24.17	29.24	34.15	30.94	25.78	30.99	30.25	30.04	30.62	32.92	30.46	31.05	30.23	30.22	30.66	33.6	25.29	25.95	36.84	33.24	29.72	1916-01-22	83.7781	1999-09-20	apocrine		T2	2	30	4	0	pN0	0		1	90	1	50	1	0.4	40	High	3	High	X	0
74	Training	(343ng/ul)	24.05	26.31	30.26	36.2	32.44	25.81	32.02	34.36	32.67	31.5	34.97	31.47	29.86	33.62	32.09	31.7	32.96	29.47	28.4	35.93	33.4	33.37	1954-01-06	45.0904	1998-12-16	ductal	1	T1	1	20	9	1	pN1a	1		1	95	1	70	2	0.1	10	Low	1	Low	X	0
75	Training	(446ng/ul)	24.91	25.13	29.87	35.47	29.36	25.62	30.73	32.42	32.9	29.88	38.46	29.79	28.62	33.44	30.77	35.78	32.76	28	27.6	33.53	31.41	31.6	1957-05-19	42.5452	1999-11-08	ductal	1	T1	1	14	12	0	pN0	0		1	95	1	95	2	0	0	Low	1	Low	X	0
76	Training	(239ng/ul)	21.63	23.89	28.74	34.81	29.63	24.43	30.14	31.18	31.15	29	38.45	29.62	28.49	32.12	30.18	29.46	31.37	27.86	27.13	33.62	28.7	30.89	1913-02-06	86.7726	1999-09-28	ductal	1	T2	2	25	12	10	pN2	2		1	80	1	80	1	0.05	5	Low	1	Low	X	0
77	Training	(ng/ul)	23.91	25.69	29.93	34.76	31.55	28.51	34.77	33.27	32.83	29.08	35.46	30.6	29.39	33.75	31.06	32.19	32.22	28.53	26.92	34.23	31.41	33.35	1952-08-05	46.8932	1999-05-31	ductal	1	T1	1	5	1	0	pN0	0		1	60	1	70	1	0.1	10	Low	1	Low	X	0
78	Training	(205ng/ul)	23.36	26.39	30.58	36.54	30.48	29.06	45	33.33	32.49	32.33	36.65	31.44	30.94	32.18	30.46	35.1	34.1	28.57	27.34	45	31.73	33.89	1927-03-22	72.6712	1999-09-29	lobular	2	T2	2	30	13	0	pN0	0		1	80	1	20	1	0.1	10	Low	1	Low	X	0
79	Training	(193ng/ul)	22.88	26.85	32.08	45	31.24	30.72	31.84	32.9	30.33	31.25	34.65	30.98	36.35	30.96	32.43	30.93	45	29.76	30.26	35.77	33.74	33.67	1924-04-04	75.3699	1999-07-05	ductal	1	T2	2	26	18	0	pN0	0		1	75	2	NEG	2	0.5	50	High	3	High	X	0
80	Training	(236ng/ul)	23.11	24.69	28.55	36.29	30.11	25.88	30.85	31.75	31.36	25.92	34.55	29.78	31	33.14	31.52	32.83	35.19	27.93	27.08	33.84	30.7	32.08	1930-02-22	69.7808	1999-10-14	lobular	2	T1	1	15	10	0	pN0	0		1	80	1	70	1	0.05	5	Low	1	Low	X	0
81	Training	(327ng/ul)	23.5	24.71	29.3	36.37	30.5	24.77	31.47	32.73	32.5	28.16	35.28	30.25	28	33.52	30.78	34.24	31.25	27.03	27.29	33.06	31.42	31.17	1957-03-23	42.4137	1999-06-30	tubular		T1	1	10	24	0	pN0	0		1	60	1	60	X	0.1	10	Low	1	Low	X	0
82	Training	(410ng/ul)	23.34	28.02	31.87	45	31.54	27.15	32.88	45	32.73	30.95	36.41	32.63	32.14	35.97	31.9	33.17	36.77	28.89	31.37	45	33.64	34.9	1939-09-08	59.9288	1999-07-02	mucinous		T2	2	22	9	0	pN0	0		1	95	2	NEG	2	0.3	30	High	3	High	X	0
83	Training	(287ng/ul)	23.03	24.38	29	35.25	31.29	24.91	30.17	29.77	30.61	29.8	34.59	29.18	31.64	31.86	30.81	29.49	38.5	30.12	27.69	37.57	30.1	31.46	1934-01-25	65.7781	1999-08-31	ductal	1	T1	1	14	5	0	pN0	0		1	90	1	40	2	0.1	10	Low	1	Low	X	0
84	Training	(96ng/ul)	24.5	25.83	31.75	34.36	31.89	26.06	32.94	33.57	33.79	28.94	33.97	31.87	30.41	34.39	31.98	45	31.55	28.71	28.3	33.13	32.24	31.88	1928-01-26	71.8959	1999-11-02	ductal	1	T2	2	50	22	21	pN3	3		1	80	1	90	2	0.05	5	Low	1	Low	X	0
85	Training	(139ng/ul)	22.86	23.86	29.86	33.06	30.92	24.36	31.07	31.35	32.18	26.3	30.55	30.35	27.58	32.04	30.02	29.85	30.82	27.26	27.03	31.59	29.89	30.61	1933-12-19	65.8356	1999-09-07	ductal	1	T1	1	20	15	2	pN1a	1		1	80	1	60	2	0.05	5	Low	1	Low	X	0
86	Training	(241ng/ul)	23.49	23.69	28.66	33.03	29.88	24.17	30.31	31.61	32.16	27.56	32.74	28.89	27.21	31.68	30.2	32.86	29.45	27.39	27.32	33.71	30.2	30.79	1939-06-22	60.5589	1999-11-09	ductal	1	T1	1	14	12	0	pN0	0		1	90	1	60	1	0.05	5	Low	1	Low	X	0
87	Training	(121ng/ul)	25.74	28.89	34.77	45	34.67	28.83	34.22	36.75	32.68	34.61	37.89	33.96	35.37	33.39	36.39	33.2	36	33.73	32.25	45	35.34	34.57	1936-11-15	61.411	1998-03-05	ductal	1	T2	2	22	17	0	pN0	0		1	90	2	NEG	3	0.45	45	High	3	High	X	0
88	Training	(56ng/ul)	26.81	29.89	34.78	45	35.43	28.97	34.72	35.42	36.61	30.96	45	34.2	34	35	35.12	35.66	33.11	31.81	31.65	35.26	36.02	34.71	1928-06-20	69.6301	1997-12-03	lobular	2	T2	2	22	27	0	pN0	0		1	70	2	NEG	1	0.05	5	Low	1	Low	X	0
89	Training	(435ng/ul)	24.62	28.04	33.07	36.36	34.56	27.08	33.24	34.21	30.29	30.42	35.02	30.53	34.4	33.46	31.27	34.53	35.82	31.71	30.93	37.59	33.47	33.68	1947-10-08	51.5863	1999-03-18	ductal	1	T1	1	12	23	1	pN1a	1		2	NEG	2	NEG	2	0.6	60	High	3	High	X	0
90	Training	(207ng/ul)	25.99	28.05	30.02	45	34.14	28.25	33.49	35.73	33.59	31.9	45	32.63	31.35	34.92	33.7	34.76	31.53	30.35	29.68	35	33.43	33.65	1956-11-26	41.1425	1998-12-10	lobular	2	T1	1	8	3	0	pN0	0		1	90	1	50	X	0.1	10	Low	1	Low	X	0
91	Training	(89ng/ul)	23.44	26.77	29.94	45	30.33	26.68	30.91	32.74	32.59	29.77	35.01	30.99	32.56	34.58	31.22	35.37	34.44	29.14	28.66	45	31.76	31.75	1922-02-25	#REF!	1999-07-12	mucinous		T1	1	2	30	11	pN3	3	0	1	95	2	NEG	2	0	0	Low	1	Low	X	0
92	Training	(217ng/ul)	28.43	26.91	32.92	45	32.66	26.29	32.68	36.34	32.44	28.9	35.82	32.84	31.88	33.87	33.21	34.33	33.27	30.06	30.37	36.72	33.87	33.9	1941-11-14	57.4329	1999-03-03	ductal	1	T1	1	13	17	0	pN0	0		1	70	1	75	2	0.1	10	Low	1	Low	X	0
93	Training	(287ng/ul)	26.2	30.16	34.87	45	45	28.15	33.13	36.14	35.4	32.39	36.77	34.03	35.18	45	34.84	35.14	45	31.47	33.36	45	35.86	35.78	1916-03-04	82.3616	1998-06-24	ductal	1	T2	2	25	27	1	pN1a	1		1	90	1	60	2	0.3	30	High	3	High	X	0
94	Training	(570ng/ul)	26.14	27.65	36.85	45	32.74	27.9	34.32	36.07	45	32.75	35.2	33.28	34.23	34.93	34.49	35.22	34.32	29.6	29.72	45	33.1	32.65	1928-03-23	70.3589	1998-06-25	papillary		T2	2	24	21	0	pN0	0		1	95	1	50	1	0.1	10	Low	1	Low	X	0
95	Training	(60ng/ul)	29.33	33.14	36.68	45	45	32.12	45	36.36	36.55	35.47	37.84	45	45	45	45	35.59	45	35.11	34.73	45	36.86	45	1938-06-07	60.7233	1999-01-05	ductal	1	T2	2	35	19	1	pN1a	1		1	40	2	NEG	X	0.6	60	High	3	High	X	0
96	Training	(98ng/ul)	28.64	33.81	37.54	45	33.61	30.78	38	45	35.83	38.24	45	38.01	45	45	45	37.52	38.99	35.07	34.96	45	37.42	45	1930-08-22	68.6548	1999-03-01	ductal	1	T2	2	23	14	1	pN1a	1		1	70	2	NEG	2	0.35	35	High	3	High	X	0
97	Training	(79ng/ul)	29.04	33.05	31.07	45	45	30.78	36.16	39.48	45	35.37	45	38.48	45	45	36.17	35.74	45	34.86	33.95	35.71	45	45	1932-03-31	66.4904	1998-07-24	lobular	2	T2	2	25	14	2	pN1a	1		1	85	1	75	1	0.05	5	Low	1	Low	X	0
98	Training	(308ng/ul)	24.41	25.2	29.66	45	31.39	25.86	31.19	33.2	33.74	31.2	34.6	30.42	30.35	34.25	30.53	33.93	30.39	28.74	28.52	34.09	31.47	31.63	1937-01-28	61.5945	1998-08-18	ductal	1	T2	2	22	18	2	pN1a	1		2	NEG	2	NEG	3	0.8	80	High	3	High	X	0
99	Training	(55ng/ul)	26.81	29.27	33.95	36.24	34.75	28.62	36.04	36.21	36.31	33.24	36.83	34.15	32.93	36.13	45	45	33	31.09	32.23	45	35.11	36.62	1935-04-01	63.7863	1998-10-28	tubulo-lobular		T1	1	6	6	0	pN0	0		1	50	1	40	X	0.2	20	High	3	Intermediate	X	0
100	Training	(315ng/ul)	24.32	24.72	30.12	35.67	31.02	25.6	30.89	33	32.45	30.6	33.95	30.43	28.07	32.39	30.84	29.69	30.56	28.46	26.53	32.35	30.54	32.16	1939-05-21	59.6685	1998-12-02	ductal	1	T2	2	25	X	0	pN0	0		1	70	1	20	2	0.6	60	High	3	High	X	0
101	Training	(222ng/ul)	22.99	25.96	30.41	45	33.39	27.08	33.97	32.7	31.99	34.7	33.59	30.87	32.44	31.44	33.27	30.92	32.83	30.3	30.42	36.08	32.44	33	1949-10-16	49.1178	1998-10-14	doppia		T1	1	18	6	0	pN0	0		1	80	1	70	1	0.1	10	Low	1	Low	X	0
102	Training	(151ng/ul)	22.96	23.99	31.94	34	31.39	24.74	30.54	31.86	38.13	28.5	33.76	29.28	28.57	32.83	31.32	31.75	32.29	29.62	26.54	37.03	33.4	30.38	1952-09-03	46.2521	1998-11-04	lobular	2	T1	1	8	19	0	pN0	0		1	20	1	50	X	0.5	50	High	3	High	X	0
103	Training	(187ng/ul)	24.82	27.9	34.88	45	35.47	28.27	33.48	34.22	35.28	33.54	36.12	32.8	34.27	34.12	34.21	33.35	38.74	34.04	29.88	45	37.48	34.6	1949-10-16	49.1178	1998-10-14	ductal	1	T1	1	18	6	0	pN0	0		1	80	1	70	1	0.1	10	Low	1	Low	X	0
104	Training	(311ng/ul)	24.39	28.29	32.82	36.42	32.31	28.63	35.64	35.06	34.93	32.18	35.99	31.77	32.72	34.45	34.21	32.61	37.69	28.78	28.76	37.47	31.57	33.21	1950-03-17	48.5753	1998-09-09	ductal	1	T2	2	25	13	0	pN0	0		1	80	1	40	3	0.3	30	High	3	High	X	0
106	Training	(116ng/ul)	26.41	28.4	31.88	45	33.82	27.94	35.19	37.52	38.34	32.76	35.83	33.11	30.73	45	35.18	45	34.86	30.06	28.89	34.43	35.49	34.19	1938-01-05	60.7753	1998-08-24	lobular	2	T1	1	19	15	0	pN0	0		1	50	1	50	X	0.1	10	Low	1	Low	X	0
107	Training	(411ng/ul)	25.37	25.1	30.57	45	30.41	26.11	31.76	32.17	31.4	28.27	33.91	30.73	29.56	31.78	31.37	34.57	33.79	27.94	27.78	45	31.75	30.55	1933-12-09	64.8548	1998-08-25	tubulo-lobular		T2	2	23	27	0	pN0	0		1	90	1	90	X	0.1	10	Low	1	Low	X	0
108	Training	(413ng/ul)	28.2	29.7	33.01	45	34.52	29.44	34.93	36.55	33.28	33.81	45	35.75	33.68	36.08	36.67	35.7	36.37	34.36	33.63	38.02	45	37.23	1959-10-01	38.9096	1998-07-28	ductal	1	T1	1	17	22	1	pN1a	1		1	90	1	70	2	0.1	10	Low	1	Low	X	0
109	Training	(175ng/ul)	26.37	29.25	32.37	45	35.03	28.93	34.59	45	34.83	32.98	45	33.84	32.44	45	34.73	34.88	35.06	32.72	31.87	38.33	33.86	35.26	1950-04-05	48.4274	1998-07-29	tubulo-lobular		T1	1	11	6	0	pN0	0		1	50	1	60	1	0.1	10	Low	1	Low	X	0
110	Training	(215ng/ul)	26.83	28.07	30.67	45	33.17	28.43	34.64	36.4	32.26	33.5	45	32.8	31.75	36.45	33.2	34.4	38.03	31.04	31.61	45	34.12	38.85	1928-05-14	70.6548	1998-11-10	ductal	1	T2	2	25	25	11	pN3	3		1	80	1	50	2	0.1	10	Low	1	Low	X	0
111	Training	(102ng/ul)	24.73	26.98	31.42	45	33.37	26.44	32.39	35.07	34.38	30.36	36.51	31.77	29.77	34.48	32.15	36.59	32.17	29.28	27.82	34.5	31.88	33.4	1924-12-24	74.7178	1999-07-20	lobular	2	T1	1	15	14	0	pN0	0		1	90	1	75	1	0.05	5	Low	1	Low	X	0
112	Training	(248ng/ul)	26.07	28.92	33.82	36.62	34.22	27.31	35.62	36.88	33.5	33.47	35.38	33.11	31.59	34.65	33.91	34.94	37.5	30.54	30.06	36.19	34.83	34.36	1934-09-21	64.7808	1999-05-20	ductal	1	T2	2	30	22	0	pN0	0		1	80	1	40	2	0.4	40	High	3	High	X	0
113	Training	(52ng/ul)	24.07	25.28	30.71	36.29	30.45	26.2	31.36	31.16	32.5	31.52	35.66	30.76	30.22	33.79	32.86	32.27	31.77	29.47	28.43	36.35	33.49	36.18	1936-01-21	62.7945	1998-09-22	ductal	1	T1	1	5	20	0	pN0	0		1	80	1	70	2	0.1	10	Low	1	Low	X	0
114	Training	(266ng/ul)	21.64	23.98	29.28	35.09	29.81	24.58	29.95	31.83	29.45	29	33.35	30.08	27.9	30.86	29.57	30.84	31.75	27.3	27.71	34.84	28.9	30.55	1918-03-04	80.7479	1998-11-12	ductal	1	T1	1	13	16	0	pN0	0		1	90	2	NEG	2	0.1	10	Low	1	Low	X	0
115	Training	(300ng/ul)	24.74	26.19	31.57	35.25	32.56	26.5	32.79	32.62	32.68	31.28	34.42	31.27	30.85	32.02	32.48	45	35.47	31.58	29.07	36.64	32.71	31.34	1938-08-06	60.6164	1999-02-08	lobular	2	T1	1	5	28	2	pN1a	1		1	90	1	60	1	0.1	10	Low	1	Low	X	0
116	Training	(303ng/ul)	23.43	28.35	31.15	45	34.74	28.39	33.16	37.17	32.49	33.99	35.62	32.56	32.87	33.21	32.86	32.48	35.22	30.34	29.67	45	32.66	33.66	1962-09-30	36.3096	1999-01-12	ductal	1	T1	1	15	23	8	pN2	2		2	NEG	2	NEG	3	0.25	25	High	3	Intermediate	X	0
117	Training	(260ng/ul)	23.88	25.24	30.74	35.15	33.37	25.38	32.48	32.43	30.83	31.32	34.49	30.68	29.59	31.66	30.61	32.58	32.94	33.15	28.88	33.61	30.32	32.27	1922-07-16	77.1808	1999-07-09	ductal	1	T1	1	10	18	0	pN0	0		1	90	1	70	2	0.1	10	Low	1	Low	X	0
118	Training	(206ng/ul)	27.63	28.71	33.33	45	36.16	28.89	34.25	36.69	34.16	45	45	34.18	33.3	36.94	34.68	37.46	34.92	31.31	31.1	45	36.56	35.16	1931-01-29	67.7973	1998-10-12	ductal	1	X	4	X	19	3	pN1a	1		1	90	1	70	2	0.2	20	High	3	Intermediate	X	0
119	Training	(62ng/ul)	24.64	26.02	30.92	37.63	31.38	26.39	31.57	33.03	34.19	30.39	36.31	30.7	30.01	33.51	31.1	31.58	33.14	28.45	28.52	33.43	31.24	32.47	1920-05-28	78.6247	1998-10-27	lobular	2	T2	2	40	21	3	pN1a	1		1	60	1	30	X	0.05	5	Low	1	Low	X	0
120	Training	(381ng/ul)	22.94	25.77	31.51	36.92	31.41	26.3	31.95	33.16	31.43	33.49	34.2	31.38	30.47	34.44	30.78	31.69	32.87	30.21	28.79	36.73	33.04	32.58	1942-02-18	57.0356	1999-01-15	ductal	1	T1	1	13	26	0	pN0	0		1	95	2	NEG	2	0.55	55	High	3	High	X	0
121	Training	(281ng/ul)	22.76	24	29.36	33.79	30.01	24.56	30	30.93	30.28	30.63	32.77	28.94	28.77	30.82	30.5	31.49	30.17	26.16	26.93	32.83	30.49	29.94	1952-10-26	46.3644	1998-12-30	lobular	2	T3	3	55	12	0	pN0	0		1	55	1	60	1	0.1	10	Low	1	Low	X	0
122	Training	(254ng/ul)	21.92	24.16	29.09	35.18	29.85	23.9	30.14	28.81	30.5	25.91	32.63	28.84	29.48	31.21	29.68	32.11	31.33	25.48	25.94	33.43	29.45	30.64	1949-03-08	50.8438	1999-11-18	ductal	1	T1	1	18	7	3	pN1a	1		2	NEG	2	NEG	3	0.6	60	High	3	High	X	0
123	Training	(239ng/ul)	25.74	27.51	32.78	45	34.57	26.85	33.89	34.64	34.31	32.59	35.97	31.98	32.58	33.62	33.77	33.39	34.64	30.56	29.45	36.45	35.26	34.56	1962-08-30	36.8767	1999-02-15	ductal	1	T2	2	22	24	0	pN0	0		1	60	1	50	3	0.3	30	High	3	High	X	0
124	Training	(198ng/ul)	25.2	27.6	33.33	45	33.29	27.56	33.93	45	33.43	29.4	38.61	32.43	32.35	35.4	33.56	35.71	35.36	29.07	29.68	36.44	35.16	34.66	1952-01-08	47.337	1999-03-23	lobular	2	T2	2	32	9	0	pN0	0		1	30	1	60	2	0	0	Low	1	Low	X	0
125	Training	(425ng/ul)	23.09	25.99	32.08	45	31.31	26.1	31.38	34.5	31.18	30.53	35.09	31.65	31.97	30.73	31.86	32.89	33.27	27.93	28.81	36.57	32.19	30.7	1936-01-28	62.789	1998-10-06	lobular	2	T2	2	40	29	27	pN3	3		1	90	1	50	X	0.3	30	High	3	High	X	0
126	Training	(83ng/ul)	23.74	25.68	30.44	45	30.99	25.25	32.33	33.8	34.34	30.33	35.63	30.85	29.21	34.41	32.31	32.58	32.36	28.4	28.91	36.41	32.42	31.62	1936-11-26	62.3233	1999-02-03	tubulo-lobular		T1	1	12	16	0	pN0	0		1	90	1	40	1	0.1	10	Low	1	Low	X	0
127	Training	(159ng/ul)	22.96	23.29	29.83	36.53	33.9	25.11	30.1	30.95	29.84	29.08	33	28.66	30.05	30.64	31.82	30.59	32.26	27.02	27.91	34.74	30.89	31.05	1947-07-20	51.3041	1998-10-26	ductal	1	T1	1	15	21	1	pN1a	1		1	90	2	NEG	2	0.05	5	Low	1	Low	X	0
128	Training	(207ng/ul)	22.76	25.17	29.99	37.04	31.23	26.33	31.42	31.09	30.28	31.13	34.83	30	29.31	30.97	30.29	32.95	32.36	28.5	28.42	36.02	31.31	31.07	1964-05-03	34.8986	1999-02-24	ductal	1	X	4	X	18	1	pN1a	1		1	40	2	10	3	0.05	5	Low	1	Low	X	0
129	Training	(193ng/ul)	25.36	27.75	32.5	45	32.91	27.53	33.34	35.95	31.47	29.29	45	32.1	32.12	35	33.16	32.5	34.34	30.15	30.24	36.13	36.75	34.23	1943-09-03	55.1726	1998-09-14	ductal	1	T1	1	20	34	0	pN0	0		1	70	2	20	3	0.1	10	Low	1	Low	X	0
130	Training	(144ng/ul)	25.28	28.29	32.21	45	32.82	27.07	34.24	45	31.65	31.86	36.44	34.04	32.16	35.7	34.42	35.14	34.37	30.09	39.43	45	33.91	34.2	1922-03-10	76.8849	1999-01-08	ductal	1	T1	1	15	7	0	pN0	0		1	80	1	80	2	0.2	20	High	3	Intermediate	X	0
131	Training	(412ng/ul)	22.95	25.43	29.5	35.54	31.67	24.96	31.92	32.33	30.96	31.89	33.87	30.57	29.26	34.27	31.24	31.05	32.2	29.49	34	34.48	31.39	32.14	1940-08-15	58.0712	1998-08-04	lobular	2	T1	1	18	25	1	pN1a	1		1	50	2	NEG	X	0.1	10	Low	1	Low	X	0
132	Training	(155ng/ul)	24.4	25.68	30.78	38.41	32.17	25.27	31.69	33.6	33.34	28.27	34.81	30.18	29.66	35.31	31.15	35.3	31.64	28.65	28.19	33.91	31.79	33.06	1953-12-03	45.2767	1999-02-01	ductal	1	T1	1	18	22	0	pN0	0		1	90	1	80	1	0.1	10	Low	1	Low	X	0
133	Training	(341ng/ul)	24.36	26.94	31	45	32.25	25.31	30.97	31.39	29.37	31.84	34.04	30.02	30.87	31.6	29.95	31.67	32.46	29.25	29.3	35.21	32.23	31.24	1931-02-05	67.7699	1998-10-27	ductal	1	T2	2	50	X	N2	pN2	2		1	40	1	40	3	0	0	Low	1	Low	X	0
134	Training	(54ng/ul)	26.21	28.74	33.12	45	33.73	27.65	34.98	35.42	33.73	29.92	45	34.9	31.75	45	34.93	35.21	33.33	31.33	32	37.34	33.82	36.51	1934-06-09	63.926	1998-03-27	NOS		T2	2	25	16	0	pN0	0		1	90	1	90	2	0.3	30	High	3	High	X	0
135	Training	(562ng/ul)	24.64	27.44	30.66	35.28	32.47	25.78	32	31.86	32.57	31.72	35.07	31.21	32.18	32.13	31.64	32.04	33.63	28.54	27.95	37.09	34.06	32.45	1926-04-10	72.4658	1928-07-23	ductal	1	T1	1	19	13	0	pN0	0		1	55	2	NEG	2	0.1	10	Low	1	Low	X	0
136	Training	(202ng/ul)	25.17	27.09	30.74	45	32.33	26.92	32.92	34.65	35.72	33	35.12	31.52	30.89	33.85	33.58	34.53	33.51	30.08	29.73	35.37	34.6	32.66	1954-07-11	44.1205	1998-07-16	ductal	1	T1	1	15	11	1	pN1a	1		1	60	1	30	2	0.15	15	High	3	Intermediate	X	0
137	Training	(626ng/ul)	23.77	27.64	29.99	35.4	30.86	27.09	34.18	34.46	32.21	32.11	38.02	34.18	31.72	32.29	31.93	34.64	33.24	28.27	32.39	37.16	31.9	31.17	1930-07-09	68.3288	1998-09-30	ductal	1	T1	1	12	15	15	pN3	3		1	90	1	40	2	0.35	35	High	3	High	X	0
138	Training	(269ng/ul)	23.12	24.94	29.42	36.14	30.89	24.22	31.07	33.17	33.07	37.58	35.33	31.32	29.42	30.14	30.3	30.87	30.75	27.96	27.67	32.86	31.35	32.42	1940-11-06	57.7479	1998-06-22	ductal	1	T1	1	20	37	0	pN0	0		1	90	1	80	2	0.1	10	Low	1	Low	X	0
151	Validation	153	24.69	28.15	31		33.03	26.91	33.09	33.47	33.22	32.16	34.41	32.64	31.6	33.37	33.36	33.5	34.74	29.58	30.17	36.67	32.52	34.37	1940-05-31	#REF!	1998-01-26	ductal	1	T1	1	13	43	0	pN0	0		1	95	1	85	2	0.2	20	High	3	Intermediate	X	0
153	Validation	460	24.89	27.05	29.61		32.97	25.37	33.07	32.67	33.43	30.28	35.2	30.97	30.35	34.64	32.36	34.34	32.64	29.55	30.32	33.95	30.19	31.7	1921-07-25	#REF!	1999-02-08	lobular	2	T2	2	25	1	0	pN0	0		1	90	2	NEG	X	0.5	50	High	3	High	X	0
154	Validation	394	26.43	29.16	31.23		34.27	27.68	34.53	33.77	33.34		36.79	34.95	33.62	34.81	34.25	33.13	36.34	30.5	31.78	36.47	36.4	34.73	1928-05-15	#REF!	1998-07-08	tubulo-lobular		T1	1	12	23	1	pN1a	1		1	90	1	85	1	0.1	10	Low	1	Low	X	0
155	Validation	N/A	26.57	28.52	30.64	36.88	33.55	26.77	34.19	33.35	32.29	31.25	36.9	31.4	31.07	33.05	32.43		35.8	30.18	31		34.56	33.08	1957-05-04	#REF!	1998-03-31	lobular	2	T3	3	70	10	7	pN2	2	1	1	40	1	70	2	0.5	50	High	3	High	X	0
156	Validation	36.8	26.42	28.43	30.16	36.62	32.98	26.7	35.41	34.34	36.65	38.5	37.58	32.34	30.76	34.26	32.51	36.13	31.93	30.67	30.49	35.14	33.35	34.92	1933-08-09	#REF!	1998-01-29	ductal	1	T1	1	5	7	0	pN0	0		1	90	0	NA	2	0	0	Low	1	Low	X	0
157	Validation	577	24.55	25.89	29.93		33.67	25.89	33	32.87	31.69	31.79	33.74	29.96	31.09	32.26	31.55	32.85	33.88	31.89	30.63		31.16	32.32	1929-06-02	#REF!	1999-03-30	ductal	1	T1	1	10	21	0	pN0	0		2	NEG	2	NEG	3	0.3	30	High	3	High	X	0
158	Validation	301	26.68	29.68	30.85			27.42	33.68		35.85	34.75	34.96	31.71	32	36.64	32.61		36.03	29.84	29.96	35.62	34.09	34.96	1964-10-17	#REF!	1998-01-19	ductal	1	T1	1	14	8	0	pN0	0		1	35	1	30	1	0.05	5	Low	1	Low	X	0
159	Validation	103	25.02	26.71	29.47		31.19	25.49	32.01	31.75	35.1	35.73	34.55	30.31	29.32	34.29	30.65	34.2	31.2	28.48	28.4	33.94	29.52	32.79	1947-02-04	#REF!	1999-05-10	tubulo-lobular		T1	1	7	16	0	pN0	0		1	80	1	70	1	0.1	10	Low	1	Low	X	0
160	Validation	77.2	27.9	29.81	30.85		33.39	28.56	36.83		32.56	35.74		34.31	32.44	34.5	34.64	38.51	35.3	30.34	32.39		34.84	35.91	1944-12-28	#REF!	1999-01-22	ductal	1	T1	1	5	9	0	pN0	0		1	65	1	90	3	0.45	45	High	3	High	X	0
161	Validation	500	23.99	25.68	28.87	34.75	31.01	24.48	30.4	31.2	30.64	31.41	33.29	29.78	28.24	31.82	30.38	34.9	30.65	27.14	27.54	31.5	29.29	29.94	1940-09-16	#REF!	2000-09-06	ductal	1	T1	1	12	8	0	pN0	0		1	70	1	70	2	0.1	10	Low	1	Low	X	0
162	Validation	330	27.88	30.71		34.45	33.97	27.7	34.79		34.7	35.6		33.85	33.04	34.99	33.27	33.36		31.68	31.97		33.63	34.15	1958-10-10	#REF!	1998-01-26	ductal	1	T2	2	31	21	0	pN0	0		1	80	1	80	3	0.35	35	High	3	High	X	0
163	Validation	224	26.42	29.48	31.39		34.96	27.78	35.47	34.3	34.05	31.21	35.65	33.88	31.82	35.56	33.11	35.1	35.83	30.39	31.45		33.17	37.02	1926-08-28	#REF!	1998-06-25	lobular	2	T1	1	10	34	0	pN0	0		1	85	1	60	2	0.07	7	Low	1	Low	X	0
165	Validation	481	23.62	24.65	28.06	39.67	28.4	23.38	28.56	29.55	30.44	27.82	31.02	27.91	27.29	29.36	28.69	31.21	30.9	25.75	24.78	33.56	27.62	28.68	1937-07-02	#REF!	2000-05-29	ductal	1	T1	1	15	27	0	pN0	0		1	90	1	90	2	0.1	10	Low	1	Low	X	0
167	Validation	152	24.64	24.79	28.99		30.92	24.67	31.23	32.56	32.99	32.3	33.49	30	28.48	31.32	30.62	33.99	30.81	27.99	28.88	32.31	31.91	31.51	1950-02-28	#REF!	2000-03-17	lobular	2	T1	1	5	12	0	pN0	0		1	75	1	85	1	0.1	10	Low	1	Low	X	0
168	Validation	426	28.45	29.77	34.11		34.19	29.3	38.2	36.58	35.16		35.65	36.5	35.48	36.27	37.18	37.87	38.33	32.29	32.95		34.61	35.99	1935-05-17	#REF!	2000-03-30	lobular	2	T2	2	45	29	18	pN3	3		1	20	1	70	1	0.1	10	Low	1	Low	NEG	0.15
169	Validation	202	23.54	23.76	28.83		30.95	23.85	29.97	30.35	29.48	29.24	31.96	29.59	28.7	30.29	29.23	32.14	31.55	27.65	28.09	32.02	30.4	29.58	1933-05-22	#REF!	2000-10-10	ductal	1	T1	1	14	11	0	pN0	0		2	NEG	2	NEG	2	0.3	30	High	3	High	x	0
170	Validation	182	23.63	24.1	29.04		29.75	24.44	30.31	30.26	32.35	30.26	32.33	28.96	27.85	30.87	30.02	31.51	29.51	27.75	27.52	33.51	29.94	30.45	1954-06-24	#REF!	2000-06-19	ductal	1	T1	1	20	29	0	pN0	0		1	85	2	NEG	1	0	0	Low	1	Low	x	0
171	Validation	535	24.17	25.47	29.03		29.46	24.69	30.58	31.01	33.69	30.4	32.61	29	28.89	32.72	30.66	31.9	30.88	27.55	29.03	33.22	30.29	30.99	1958-06-26	#REF!	2000-06-27	tubular		T1	1	15	14	0	pN0	0		1	70	2	NEG	1	0.05	5	Low	1	Low	x	0
172	Validation	981	20.77	22.01	28.3		30.82	N/A	28.93	28.05	27.98	28.85	30.48	28.39	27.79	28.39	28.74	28.93	29.87	27.11	29.76	34.03	27.22	30.14	1952-11-08	#REF!	2000-07-11	ductal	1	T2	2	22	28	0	pN0	0		2	NEG	2	NEG	3	0.25	25	High	3	Intermediate	x	0
173	Validation	636	24.21	26.58	30.85		30.42	N/A	32.9	33.31	33.13	32.53	33.89	32.02	32.08	33.06	32.63	36.28	32.83	31.56	31.65	38.37	31.88	33	1927-09-28	#REF!	2000-04-11	ductal	1	T1	1	20	20	0	pN0	0		1	80	1	80	3	0.1	10	Low	1	Low	X	0
174	Validation	291	25.64	27.67	31.48		31.23	N/A	33.19	33.75	36.15	34.31	34.19	33.28	30.46	36.1	32.74		32.76	30.35	30.51	35.58	32.98	33.03	1920-10-26	#REF!	2000-04-14	ductal	1	T2	2	25	20	0	pN0	0		2	NEG	2	NEG	3	0.4	40	High	3	High	x	0
175	Validation	164	25.87	26.64	30.63		30.96	N/A	32.92	32.33	32.35	32.48	34.39	32.47	30	31.91	32.38		32.58	29.8	30.15	35.67	31.3	34.24	1945-08-11	#REF!	2000-02-29	ductal	1	T1	1	10	13	0	pN0	0		1	90	1	90	1	0.2	20	High	3	Intermediate	X	0
176	Validation	55.3	22.94	24.96	28.98		29.41	N/A	30.88	30.95	31.42	31.41	33.61	30.65	29.7	32.34	30.4	30.79	31.45	27.61	28.38	35.87	28.07	32.33	1923-04-09	#REF!	2000-04-11	ductal	1	T1	1	5	22	0	pN0	0		1	90	1	90	2	0.05	5	Low	1	Low	X	0
177	Validation	98.7	23.51	23.89	29.15	38.06	30.59	N/A	31.06	31.19	31.9	35.03	33.3	31.41	27.93	31.09	30.24	32.25	30.46	27.86	29.99	34.37	31.34	31.97	1940-12-07	#REF!	2000-03-02	lobular	2	T1	1	20	36	0	pN0	0		1	40	1	90	2	0.2	20	High	3	Intermediate	X	0.01
178	Validation	374	24.06	24.85	29.25		31.38	N/A	31.03	31.4	33.58	35.05	32.56	30.2	29.1	32.76	30.68	30.81	30.68	27.39	30.24	35.59	31.22	31.52	1946-05-26	#REF!	2000-08-31	ductal	1	T1	1	10	12	0	pN0	0		1	70	1	70	2	0.15	15	High	3	Intermediate	X	0
179	Validation	429	23.4	24.15	28.36		31.98	N/A	29.45	31.04	31.16	29.89	31.48	29.76	29.31	31.25	29.68	35.39	30.86	29.78	30.68	34.51	29.13	30.5	1913-12-18	#REF!	2000-04-13	secretory		X	4	X	12	12	pN3	3		2	NEG	2	NEG	X	0.15	15	High	3	Intermediate	X	0
180	Validation	114	25.64	27.67	31.48		31.23	N/A	33.19	33.75	36.15	34.31	34.19	33.28	30.46	36.1	32.74		32.76	30.35	30.51	35.58	32.98	33.03	1941-09-17	#REF!	2000-05-19	ductal	1	T1	1	5	11	0	pN0	0		1	90	1	90	2	0	0	Low	1	Low	X	0
181	Validation	495	22.71	24.57	29.7		32.18	N/A	30.78	31.36	30.83	31.96	32.48	30.14	29.57	30.22	30.64	30.74	31.14	29.11	31.3	35.33	30.3	32.53	1943-04-02	#REF!	2000-05-16	ductal	1	T1	1	18	16	0	pN0	0		2	NEG	2	NEG	3	0.5	50	High	3	High	X	0
182	Validation	533	24.28	24.28	29.17		30.17	N/A	31.09	31.35	30.35	36.67	33.77	28.98	30.71	30.77	28.53	31	32.97	29.08	32.43	35.57	33.35	32.17	1952-02-05	#REF!	2000-05-18	metaplasico		T1	1	15	17	0	pN0	0		2	NEG	2	NEG	3	0.4	40	High	3	High	X	0
183	Validation	386	24.5	25.31	31.08		33.21	N/A	33.18	33.36	33.42	30.89	34.64	32.04	30.36	34.09	32.4	32.44	31.6	29.86	32.01	35.15	32.53	33.89	1945-07-24	#REF!	2000-07-28	ductal	1	T1	1	17	9	0	pN0	0		2	NEG	1	90	2	0.02	2	Low	1	Low	X	0
184	Validation	347	25.55	26.5	29.79		33.84	N/A	33.1	32.42	31.9	33.77	34.38	30.24	31.18	30.17	31.74	33.18	32.6	31.25	33.6	35.96	32.08	33.77	1944-11-12	#REF!	2000-09-05	ductal	1	T1	1	8	41	0	pN0	0		2	NEG	2	NEG	3	0.25	25	High	3	Intermediate	POS	0.1
185	Validation	259	23.93	26.03	29.39		30.43	N/A	31.29	31.69	31.73	30.82	33.59	30.23	28.27	31.51	30.87	33.33	32.11	29.88	29.09	35.2	30.48	31.29	1937-12-05	#REF!	2000-08-29	ductal	1	T1	1	14	21	0	pN0	0		1	80	1	80	2	0.1	10	Low	1	Low	X	0
186	Validation	362	22.03	23.31	28.85		28.01	N/A	29.34	30.03	30.64	33.85	31.72	28.95	28.4	30.74	29.72	28.42	30.87	27.33	27.98		27.8	30.72	1925-12-12	#REF!	2000-06-05	mucinous		T1	1	10	15	0	pN0	0		1	90	1	80	X	0.15	15	High	3	Intermediate	X	0
187	Validation	648	23.48	24.8	30.41		28.86	N/A	30.5	31.1	31.28	30.8	32.39	29.42	28.95	30.2	30.3	31.36	30.9	26.31	26.96	33.95	28.09	29.74	1933-10-07	#REF!	2000-07-12	ductal	1	T1	1	18	7	0	pN0	0		1	90	1	80	2	0.1	10	Low	1	Low	X	0
188	Validation	906	24.53	24.6	30.64		31.64	N/A	31.63	32.52	32.21	28.94	34.04	30.95	29.17	32.26	32.28	32.55	32.07	28.76	31.3	36.86	32.4	32.38	1951-01-13	#REF!	1999-12-12	ductal	1	T1	1	20	5	2	pN1a	1		1	80	1	90	2	0.2	20	High	3	Intermediate	X	0
189	Validation	450	25.01	26.29	30.88		33.22	N/A	32.97	33.3	32.86	37.06	34.24	32.3	30.47	34.41	31.87	36.07	32.49	30.83	30.18	34.27	32.24	35.01	1927-10-22	#REF!	1999-12-21	lobular	2	T1	1	15	26	26	pN3	3		1	80	1	80	X	0.1	10	Low	1	Low	X	0
190	Validation	169	22.36	23.55	28.41	39.81	29.27	N/A	30.48	30.12	32.22	30.49	32.04	29.33	27.48	31.49	29.62	30.6	28.97	27	27.79	32.5	29.08	30.07	1941-09-29	60.0548	2001-09-04	ductal	1	T1	1	11	21	0	pN0	0		1	90	1	90	1	0.05	5	Low	1	Low	X	0.05
191	Validation	187	22.02	23.87	28.28		30.81	N/A	30.13	30.45	29.82	29.98	31.82	29.44	30.38	29.96	29.02	30.42	31.68	29.99	30.63	35.27	29.6	31.4	1961-10-14	#REF!	2000-07-13	ductal	1	T1	1	15	28	0	pN0	0		2	NEG	2	NEG	3	0.5	50	High	3	High	X	0
192	Validation	273	21.48	22.02	26.84	38.84	27.01	N/A	28.96	28.25	28.77	30.13	31.66	28.9	26.18	28.82	28.6	29.78	28.14	25.87	27.8	32.1	28.83	30.78	1934-08-30	#REF!	1999-12-14	ductal	1	T1	1	6	14	0	pN0	0		1	95	1	95	2	0.2	20	High	3	Intermediate	X	0
193	Validation	258	24.53	26.3	30.3		30.69	N/A	32.15	33.73	33.65		34.43	31.4	30.3	36.45	31.76	35.41	31.43	28.7	30.91	33.89	32.67	33.26	1952-03-18	#REF!	2000-10-30	ductal	1	T1	1	12	15	0	pN0	0		1	90	1	85	2	0.1	10	Low	1	Low	X	0
194	Validation	60	25.82	25.89	30.23		33.75	N/A	32.52	32.03	31.04	36.01	33.34	30.75	32.08	30.98	32.02	34.78	31.53	29.79	31.98		31.24	31.84	1930-11-19	#REF!	2000-03-24	ductal	1	T1	1	18	11	0	pN0	0		1	90	1	80	2	0.7	70	High	3	High	X	0
195	Validation	421	23.51	25.16	29.42		30.05	N/A	31.41	32.07	31.97	34.64	33.42	31.24	30.05	33.33	30.83	32.24	33.19	27.79	29.42		31.19	33.68	1936-01-04	65.537	2001-05-18	ductal	1	T2	2	26	16	5	pN2	2		1	95	1	95	2	0.1	10	Low	1	Low	X	0
196	Validation	1120	24.47	24.46	30.08		32.76	N/A	31.58	32.24	30.24	27.99	34.41	31.16	29.99	31.53	31.22	33.9	32.92	29.66	31.78	34.76	32.6	33.11	1937-04-17	#REF!	1999-11-23	lobular	2	T1	1	20	20	2	pN1a	1		1	60	1	80	1	0.3	30	High	3	High	X	0
197	Validation	1140	21.8	23.63	28.93		29.26	N/A	30.85	32.23	29.65	31.09	31.89	30.1	29.61	30.34	29.88	30.84	31.31	30.34	32.21	35.02	30.02	31.63	1933-07-23	#REF!	1999-12-09	ductal	1	T1	1	20	6	0	pN0	0		2	NEG	2	NEG	3	0.6	60	High	3	High	X	0
198	Validation	250	24.15	24.89	29.9		31.13	N/A	32	32.26	32.83	30.31	37.29	31.1	28.81	33.55	32	32.58	32.14	29.32	30.51	33.87	32.04	31.93	1943-04-20	#REF!	2000-06-09	lobular	2	T1	1	8	11	0	pN0	0		1	70	1	70	1	0.1	10	Low	1	Low	X	0
199	Validation	915	23.86	25.44	31.08		35.33	N/A	33.1	32.86	33.03	31.88	34.16	31.56	30.77	33.55	32.53	32.47	31.38	29.42	32.21	36.15	32.15	34.01	1941-08-08	#REF!	2000-05-05	ductal	1	T1	1	20	24	1	pN1a	1		2	NEG	1	40	2	0.1	10	Low	1	Low	X	0
200	Validation	214	23.14	23.77	29.27		29.1	N/A	29.86	30.94	32.69	29.88	33.26	29.57	27.9	32.06	30.65	32.97	29.76	27.76	28.61	33.06	30.05	31.14	1929-03-25	#REF!	2000-11-07	NOS		T1	1	12	41	2	pN1a	1		1	90	1	30	2	0.1	10	Low	1	Low	X	0
201	Validation	664	22.18	22.71	27.9		28.18	N/A	29.25	29.61	30.63	24.78	32.71	28.81	28.19	30.33	29.25	33.63	31.16	26.74	27.16	34.9	28.91	30.79	1948-04-07	53.0274	2001-03-06	ductal	1	T2	2	30	39	11	pN3	3		1	90	1	90	2	0.1	10	Low	1	Low	X	0.1
202	Validation	1000	22.31	22.84	27.97		32.3	N/A	30.07	29.5	27.94	29.89	32.24	28.95	29.79	30.47	30.41	32.86	32.29	30.8	31.61	34.87	29.72	33.35	1941-11-17	#REF!	2000-05-18	ductal	1	T2	2	22	26	1	pN1a	1		2	NEG	2	NEG	3	0.25	25	High	3	Intermediate	X	0
203	Validation	153	21.36	23.11	27.88		28.98	N/A	30.11	30.13	31.71	31.94	32.48	29.75	28.38	31.85	29.6	29.28	28.9	28.09	28.24	33.44	29.18	31.39	1949-02-25	52.3288	2001-05-15	medullary		T1	1	10	35	3	pN1a	1		1	80	2	NEG	3	0	0	Low	1	Low	NEG	0.1
204	Validation	272	23.06	23.99	28.92		30.37	N/A	31.28	31.04	31.61	28.69	33.94	31.06	28.32	33.24	30.55	33.08	30.27	27.36	27.6	33.22	30.53	32.18	1955-08-19	46.2274	2001-09-18	ductal	1	T1	1	20	6	1	pN1a	1		1	40	1	90	1	0.05	5	Low	1	Low	NEG	0
205	Validation	304	24.51	25.35	29.85		33.42	N/A	32.74	32.92	30.23	31.52	33.19	30.59	31.38	31.79	30.14		32.75	31.01	32.45	33.83	33.32	32.19	1951-02-28	#REF!	2000-01-07	ductal	1	T1	1	12	8	0	pN0	0		2	NEG	2	NEG	3	0.3	30	High	3	High	X	0
206	Validation	1356	27.91	29.29			33.97	N/A	39.92		35.85	37.43	36.1	38.21	36.11	34.45		31.98	35.53		37.87				1940-11-24	60.1452	2000-11-24	ductal	1	T2	2	42	21	0	pN0	0		1	70	1	90	2	0.4	40	High	3	High	X	0
207	Validation	430	24.37	24.33	29.33	39.82	29.15	N/A	30.93	30.68	30.61	31.79	33.54	31.17	29.12	31.17	32.27	32.33	31.37	28.41	30.09	35.8	33.04	32.26	1942-03-16	59.1342	2001-03-22	ductal	1	T1	1	10	15	7	pN2	2		1	95	1	95	2	0.1	10	Low	1	Low	X	0
208	Validation	200	26.08	27.38	32.19		33.96	N/A	36.11	34.46	35.38	34.03	35.26	34.16	31.63	35.82	35.01	34.46	32.27	31.41	33.29	36.12	33.3	35.65	1936-09-01	64.8959	2002-03-05	ductal	1	T1	1	17	22	4	pN2	2		1	90	1	80	2	0.02	2	Low	1	Low	NEG	0.31
209	Validation	400	22.33	22.38	27.35	38.25	29.33	N/A	29.81	30.44	30.14	26.12	32.22	28.65	26.79	29.38	29.46	30.46	30.05	26.08	28.02	34.98	28.66	29.95	1942-08-05	58.863	2001-05-09	ductal	1	T1	1	18	12	0	pN0	0		1	90	1	30	2	0.15	15	High	3	Intermediate	X	0.01
210	Validation	746	23.23	24.18	29.01		27.6	N/A	30.97	30.41	29.34	30.87	34.25	30.09	28.84	30.4	30.91	30.93	31.79	29.32	29.84	35.93	30.38	30.68	1947-11-13	#REF!	2000-12-12	ductal	1	T2	2	30	17	3	pN1a	1		1	70	1	50	2	0.25	25	High	3	Intermediate	NEG	0.01
211	Validation	664	23.73	25.16	30.24		30.14	N/A	31.24	33.37	31.48	32.64	34.41	31.5	28.76	32.8	31.08	30.17	31.7	29.49	28.76	35.94	30.71	31.94	1929-08-03	#REF!	2000-10-23	ductal	1	T1	1	20	17	0	pN0	0		1	90	1	90	2	0.1	10	Low	1	Low	X	0
212	Validation	274	23.99	24.4	29.16		28.83	N/A	30.68	31.66	31.77	28.11	33.11	30.3	27.83	31.69	31.26	33.6	30.37	27.94	27.63	35.02	30.23	31.72	1955-10-16	#REF!	2000-07-05	tubulo-lobular		T1	1	10	16	0	pN0	0		1	80	1	90	1	0.1	10	Low	1	Low	X	0
213	Validation	812	26.19	26.63	34		31.84	N/A		34.55	33.51	34.92	34.07	36.83	34.13	32.33	37.16	27.69	33.95	38.15	37.41		34.72	35.66	1921-07-30	#REF!	2000-05-24	medullary		T1	1	17	19	0	pN0	0		2	NEG	2	NEG	3	0.8	80	High	3	High	X	0
214	Validation	144	23.98	25.09	29.96		31.24	N/A	32.36	32.97	34.41	31.28	34.46	31.55	29.19	33.95	31.89	33.26	30.51	28.32	29.6	35.02	31.44	33.12	1932-06-16	#REF!	2000-04-14	tubulo-lobular		T1	1	7	9	0	pN0	0		1	90	1	60	2	0.1	10	Low	1	Low	X	0
215	Validation	600	23.34	23.64	29.04	37.46	28.93	N/A	30.21	31.03	31.99	28.52	33.23	29.82	27.59	32.06	30.03	33.02	30.04	26.94	28.62	33.8	29.81	32.43	1945-04-04	#REF!	2000-06-01	tubular		T1	1	15	7	0	pN0	0		1	90	1	90	1	0.1	10	Low	1	Low	X	0
216	Validation	257	24.68	26.17			32.67	N/A	32.28	32.87	34.2	33.62	35.02	32.01	30.38	33.61	32.21	26.53	32.49	28.13	30.52	35.16	33.04	33.62	1957-12-29	#REF!	1999-12-17	tubular		T1	1	5	16	0	pN0	0		1	80	1	95	1	0.05	5	Low	1	Low	X	0
217	Validation	863	22.96	22.7	28.44	37.85	29.2	N/A	29.62	30.2	32.18	25	31.69	28.77	27.06	31.37	30.17	33.07	30.36	28.07	28.84	32.78	28.81	31.07	1949-09-01	#REF!	1999-12-14	lobular	2	T2	2	50	18	5	pN2	2		1	70	1	30	X	0.05	5	Low	1	Low	X	0
218	Validation	216	23.95	24.96	29.85		30.22	N/A	31.33	31.51	33.18	31.55	33.49	30.6	28.7	32.36	31.74	28.56	30.94	28.79	28.62	34.14	28.96	32.18	1934-06-10	#REF!	2000-05-02	lobular	2	T1	1	5	14	0	pN0	0		1	90	1	90	1	0.05	5	Low	1	Low	NEG	0
219	Validation	850	23.42	25.23	30.79		30.16	N/A	31.49	33.05	32.03	30.89	33.77	31.4	30.21	33.04	31.39	29	32.56	30.54	31.45	36.31	30.69	32.12	1915-06-08	#REF!	2000-12-11	ductal	1	T1	1	20	X	X	X	4		1	90	1	90	2	0.05	5	Low	1	Low	X	0
220	Validation	846	22.87	24.71	28.41		30.03	N/A	30.53	31	29.52	30.21	31.64	29.43	29.29	31.31	29.31	30.85	32.17	28.79	30.35	35.92	28.45	31.86	1965-08-10	#REF!	2000-01-24	pleomorfo		T1	1	15	9	0	pN0	0		1	30	1	50	3	0.6	60	High	3	High	X	0
221	Validation	512	22.84	23.35	27.83		27.25	N/A	29.2	29.98	29.41	28.87	33.65	29.16	28.33	29.9	29.13	34.06	29.99	29.12	28.24	33.17	29.49	30.59	1929-06-15	#REF!	2000-10-24	ductal	1	T2	2	22	18	1	pN1a	1		1	90	1	20	2	0.25	25	High	3	Intermediate	X	0
222	Validation	967	24.5	24.88	29.71		34.8	N/A	31.22	31.75	29.03	31.61	32.77	30.69	30.41	29.42	30.03	30.69	33.35	26.35	31.03	36.2	34.03	31.33	1938-08-29	#REF!	2000-04-03	ductal	1	T2	2	40	11	0	pN0	0		1	80	1	70	3	0.55	55	High	3	High	X	0
223	Validation	915	22.34	24.22	29.3		31.49	N/A	29.9	32.69	31.39	30.55	33.69	29.87	28.06	32.23	30.98	34.94	31.39	29.87	30.33	34.22	31.43	31.57	1941-12-10	#REF!	2000-04-13	NOS		T2	2	25	30	0	pN0	0		1	80	1	50	2	0.3	30	High	3	High	X	0
224	Validation	165	24.34	25.76	30.83		31.81	N/A	32.76	32.8	34.18	35.04	35.19	32.07	30.24	34.56	32.11	30.29	31.99	29.94	30.99	35.02	30.08	32.59	1938-01-01	#REF!	2000-05-02	ductal	1	T1	1	10	30	0	pN0	0		1	90	1	30	2	0.05	5	Low	1	Low	X	0.01
225	Validation	569	24.48	24.35	29.88		29.53	N/A	31.5	31.52	31.55	29.67	33.86	30.49	29.45	32.99	31.47	35.41	31.44	27.79	28.49	36.82	30.82	32.32	1937-08-20	63.9726	2001-06-01	ductal	1	T1	1	15	8	0	pN0	0		1	70	1	50	2	0.1	10	Low	1	Low	X	0
226	Validation	551	22.97	24.78	29.8		33.61	N/A	31.58	33.44	29.69	29.67	32.86	31.42	30.49	32.56	31.25	32.56	32.49	30.78	31.59	33	30.11	33.65	1933-05-27	68.2219	2001-06-28	ductal	1	T2	2	30	22	17	pN3	3		2	NEG	2	NEG	3	0.65	65	High	3	High	X	0
227	Validation	100	23.91	25.46	30.09		33.27	N/A	32.52	33.06	31.2	33.77	35.6	31.25	29.2	31.91	31.59	29.68	32.43	28.32	31.24	38.52	31.92	33.61	1925-01-06	#REF!	1997-11-14	ductal	1	T1	1	10	7	0	pN0	0		2	NEG	2	NEG	3	0.3	30	High	3	High	X	0
228	Validation	462	24.07	25.29	30.91		30.98	N/A	31.94	33.41	32.71	28.02	34.45	31.57	30.29	33.11	31.56	32.42	31.36	29.6	30.15	35.38	30.02	34.12	1923-08-08	#REF!	2000-04-07	ductal	1	T1	1	20	15	2	pN1a	1		1	95	1	95	2	0	0	Low	1	Low	NEG	0.1
229	Validation	244	24.39	25.75	30.19		31.97	N/A	32.49	32.65	34.38	32.5	34.55	31.76	29.38	33.59	32.74	34.18	31.47	29.08	30.81	34.43	32.72	33.85	1951-08-26	#REF!	2000-04-04	lobular	2	T1	1	13	21	0	pN0	0		1	70	1	90	2	0.05	5	Low	1	Low	X	0
230	Validation	790	22.3	21.94	27.87		28.86	N/A	29.47	29.08	29.7	29.04	30.59	29.09	28.27	29.7	29.49	29.96	31.55	28.7	29.22	33.65	28.78	31.01	1964-02-01	37.1534	2001-03-01	misto		T3	3	60	43	29	pN3	3		1	50	1	50	3	0.3	30	High	3	High	POS	0.7
231	Validation	426	23.81	25.67	31.12		32.85	N/A	33.14	33.64	31.22	32.27	35.76	32.46	30.53	33.35	32.11	29.87	32.82	29.21	30.35		30.34	33.43	1934-01-01	67.3205	2001-02-27	ductal	1	T2	2	23	12	0	pN0	0		1	90	2	NEG	3	0.3	30	High	3	High	X	0
232	Validation	184	25.84	27.25	31.31		32.63	N/A	33.67	33.62	34.15	32.9	34.62	32	30.85	32.79	34.11	31.14	32.32	31.92	32.32	35.42	33.83	34.4	1933-05-11	67.7753	2001-01-08	ductal	1	T1	1	8	11	2	pN1a	1		1	90	1	40	1	0.05	5	Low	1	Low	X	0
233	Validation	666	22.34	23.73	28.43		29.72	N/A	30.41	30.92	30.37	29	32.28	30.31	28.45	31.12	29.38	32.52	30.78	28.09	29.56	34.27	29.41	31.59	1926-08-07	74.7288	2001-02-26	mucinous		T1	1	20	24	0	pN0	0		1	90	1	50	2	0.05	5	Low	1	Low	NEG	0.1
234	Validation	794	24.93	25.18	29.83		33.52	N/A	31.31	31.92	31.98	29.95	32.94	31.18	30.26	31.73	31.66	30.4	31.84	32.11	32.07	33.92	32.78	32.82	1935-01-31	66.126	2001-02-18	ductal	1	T1	1	18	17	0	pN0	0		2	NEG	2	NEG	2	0.3	30	High	3	High	NEG	0.3
235	Validation	837	25.43	25.39	31.32		30	N/A	32.19	32.57	32.13	30.82	33.7	31.72	30.59	31.83	32.57	33.6	32.46	29.29	29.83	37.57	29.87	33.06	1932-08-20	69.2849	2001-10-02	ductal	1	T2	2	25	22	0	pN0	0		1	20	1	50	2	0.15	15	High	3	Intermediate	NEG	0.01
236	Validation	1200	22.84	24.29	28.68		29.76	N/A	31.46	31.29	28.24	31.86	31.86	30.49	30.08	29.54	28.11	31.58	32.34	28.07	31.86	34.79	31.72	31.56	1962-09-12	39.2027	2001-10-17	ductal	1	T2	2	30	18	9	pN2	2		1	70	1	60	3	0.7	70	High	3	High	NEG	0.1
237	Validation	540	23.07	24.34	29.53		30.88	N/A	31.76	31.67	31.94	29.94	32.78	31.16	30.39	35.03	31.43	30.84	33.3	30.85	30.4	36.82	30.69	33.29	1922-09-09	78.4137	2000-11-27	ductal	1	T1	1	15	7	2	pN1a	1		1	90	1	90	2	0.1	10	Low	1	Low	NEG	0.6
238	Validation	574	22.03	22.98	28.83		29.4	N/A	29.73	29.76	30.8	30.04	32.39	29.6	27.75	31.12	30.04	28.85	29.17	26.29	26.91	33.82	29.62	31.1	1925-02-14	76.1699	2001-03-13	lobular	2	T1	1	12	15	0	pN0	0		1	90	1	90	2	0.1	10	Low	1	Low	X	0
239	Validation	1482	25.02	25.28	29.97		32.99	N/A	31.75	32.42	30.21	31	32.95	30.99	30.64	30.86	31.89	32.47	33.74	31.26	32.18	37.83	33.93	32.85	1932-09-26	69.2411	2001-11-06	ductal	1	T1	1	15	23	2	pN1a	1		1	80	1	20	3	0.4	40	High	3	High	NEG	0.1
240	Validation	591	21.61	22.58	27.13		28.97	N/A	30.4	29.57	30.23	30.36	30.6	28.94	27.32	31.72	29.7	29.72	31.61	27.47	29.07	34.93	28.72	30.43	1950-06-30	50.9452	2001-04-06	ductal	1	T2	2	30	21	1	pN1a	1		1	40	1	40	2	0.1	10	Low	1	Low	NEG	0.5
241	Validation	860	21.73	22.55	28.36		31.79	N/A	30.22	29.01	28.97	28.99	31.04	29.18	27.92	29.73	29.44	30.4	30.32	28.83	29.64	33.7	29.04	30.56	1921-03-17	80.2	2001-04-05	ductal	1	T1	1	20	X	X	X	4		1	50	2	NEG	3	0.5	50	High	3	High	POS	0.01
242	Validation	689	22.87	24.07	30.09		32.17	N/A	31.11	33.02	30.03	32.54	33.1	30.47	28.87	30.58	30.46	31.79	31.78	28.82	29.26	34.43	30.43	32.14	1954-11-04	46.4849	2001-03-23	ductal	1	T2	2	30	15	2	pN1a	1		1	70	1	80	2	0.2	20	High	3	Intermediate	X	0
243	Validation	826	20.92	22.19	27.7		27.69	N/A	28.81	28.95	30.7	28.52	31.24	28.76	27	30.37	28.93	31.17	30.08	26.92	26.68	34.64	27.83	30.1	1931-12-03	70.0164	2001-10-01	ductal	1	T2	2	30	9	1	pN1a	1		1	70	1	60	2	0.15	15	High	3	Intermediate	NEG	0.1
244	Validation	174	25.71	25.18	30.49		32.61	N/A	32.04	32.68	31.43	31.33	34.57	30.1	29.26	32.29	31.42	29.2	32.24	31.21	29.92	37.66	30.7	35.75	1927-04-04	#REF!	1999-10-04	ductal	1	T1	1	5	16	14	pN3	3		1	80	1	60	2	0	0	Low	1	Low	X	0
245	Validation	180	25.12	26.04	29.9		31.44	N/A	31.66	32.82	32.94	32.53	35.27	30.46	29.26	33.84	31.68	32.35	30.47	28.31	29.43		31.66	34.42	1946-03-08	#REF!	1997-12-30	lobular	2	T1	1	8	23	0	pN0	0		1	75	1	35	X	0.1	10	Low	1	Low	X	0
246	Validation	54.6	24.49	26.23	30.91		32.15	N/A	33.36	33.88	33.46	33.49	35.47	31.75	32.12	36.4	32.51	29.87	32.31	29.85	30.62	37.48	32.88	34.15	1965-03-24	#REF!	2000-08-21	ductal	1	X	4	X	16	15	pN3	3		1	30	2	NEG	3	0.1	10	Low	1	Low	NEG	0.01
247	Validation	173	23.12	23.58	28.9	39.19	30.32	N/A	30.7	30.03	30.96	29.98	33.45	28.66	27.54	32.02	30.03	28.88	29.53	27.52	28.45	33.27	30.7	32.72	1947-04-03	#REF!	2000-07-20	ductal	1	T1	1	8	14	0	pN0	0		1	90	1	90	2	0.1	10	Low	1	Low	X	0
248	Validation	66.2	26.46	29	31.06		34.56	N/A	34.02	34.77	33.27		36.38	32.9	31	34.28	33.56	32.16	32.6	30.92	32.26	35.86	34.33	36.37	1932-05-12	68.7151	2000-12-27	tubular		T1	1	8	33	0	pN0	0		1	90	1	85	1	0.05	5	Low	1	Low	NEG	0
249	Validation	217	27.65	28.41			33.68	N/A		38.92				35.85	32.45	37.17	35.75		31.75	31.77	34.17		35.49	36.14	1934-09-24	66.3644	2000-12-01	ductal	1	T1	1	18	14	0	pN0	0		1	90	1	90	1	0.05	5	Low	1	Low	NEG	0.1
250	Validation	450	23.13	25.36	30.62			N/A	32.69	32.83	28.98	33.35	32.9	30.27	31.17	30.74	30.45	29.58	32.4	30.45	30.29	39.34	31.41	35.85	1952-07-19	#REF!	1998-01-28	ductal	1	T1	1	20	12	0	pN0	0		2	NEG	0	NA	3	0.7	70	High	3	High	X	0
251	Validation	(196ng/ul)	24.5	26.48	32.93		33.72	25.82	33.58	34.33	35.13	30.19	35.8	32.43	31.36	34.72	32.45	30.01	35.73	30.2	31.21		33.18	35.87	1934-02-19	69	2003-04-14	ductal	1	T2	2	24	12	0	pN0	0		1	40	1	30	2	0	0	Low	1	Low	NEG
252	Validation	(273ng/ul)	21.95	23.85	29.73		32.06	23.68	30.52	30.57	30.65	29.16	32.71	29.56	30.3	31.15	29.94	29.04	37.28	31	30.01		30.34	33.1	1941-11-12	60	2002-02-05	pleomorfo		T1	1	9	19	3	pN1a	1		2	NEG	2	NEG	3	0.15	15	High	3	Intermediate	NEG
253	Validation	(260ng/ul)	27.46	28.43	35.43		37.41	28.06	31.79	29.57	36.97	33.54	36.96	36.46	33.49	30.31	35.01	32.19	36.94	33.78	35.36		35.2		1943-12-05	59	2002-08-26	ductal	1	T2	2	32	14	13	pN3	3		1	50	2	NEG	3	0.2	20	High	3	Intermediate	NEG
254	Validation	(246ng/ul)	27.99	28.53	35.14		36.79	28.54	36.76	35.07	36.3	33.55	37.04	34.98	33.1	36.8	34.83	32.21	37.4	34.28	35.48		36.17	37.9	1937-06-10	65	2002-06-17	ductal	1	T2	2	35	42	25	pN3	3		2	NEG	2	NEG	3	0.5	50	High	3	High	POS
255	Validation	(235ng/ul)	28.02	29.07	35.63		39.1	30.45	36.31	39.14	39.45	35.35	38.45	35.4	36.26		38.17	32.99		39.04	38.92	38.13	38.34	38.18	1942-05-25	61	2003-05-27	apocrine		T2	2	50	12	0	pN0	0		2	NEG	2	NEG	3	0.25	25	High	3	Intermediate	POS
256	Validation	(149ng/ul)	29.13	29.85	34.51	38.12	35.78	29.86	36.32	36.45	37.82	36.08	38.77	35.54	34.49	37.44	37.54	35.61	36.58	33.63	35.53	38.85	37.7	37.98	1946-07-30	57	2003-07-17	lobular	2	T1	1	10	4	0	pN0	0		1	40	1	40	3	0.1	10	Low	1	Low	NEG
257	Validation	(364ng/ul)	25	27.02	31.09		31.45	25.68	32.47	31.65	33.45	28.75	33.58	31.8	29.97	31.8	31.83	31.61	35.13	31.48	31.48		33.75	34.36	1946-04-04	44	1990-03-28	tubular		T1	1	15	17	1	pN1a	1		1	95	1	60	X	X	X	X	0	X	POS
258	Validation	(386ng/ul)	21.55	24.8	30.79		30.9	23.3	30.63	30.64	32.37	29.72	32.48	29.63	28.61	31.62	28.98	30.11	32.7	28.65	27.99	35.58	28.91	31.82	1933-05-15	70	2003-10-23	ductal	1	T2	2	40	12	1	pN1a	1		1	95	2	50	3	0.05	5	Low	1	Low	NEG
259	Validation	(202ng/ul)	27.07	27.54	33.67		34.88	27.57	34.85	33.56	34.92	32.37	34.42	33.56	31.88	35.26	33.48	30.89	36.06	33.06	32.93		34.93	36.26	1938-01-15	66	2004-08-12	pleomorfo		T2	2	40	15	15	pN3	3		2	NEG	2	NEG	3	0.1	10	Low	1	Low	NEG
260	Validation	(146ng/ul)	22.47	22.91	28.32		29.37	22.41	29.11	29.12	31.06	28.32	32.2	27.6	27.03	30.19	28.76	26.2	30.17	27.72	26.9	33.36	28.67	31.03	1952-06-03	52	2005-01-20	ductal	1	T1	1	9	1	0	pN0	0		1	90	1	40	2	0.1	10	Low	1	Low	NEG
261	Validation	(614ng/ul)	26.86	27.19	34		34.8	26.26	34.35	35.55	35.74	31.9		33.04	31.78	34.48	31.02	32.82	37.09	31.93	33.38	37.32	33.71	36.4	1951-02-21	52	2002-01-14	ductal	1	T2	2	23	21	3	pN1a	1		2	NEG	1	70	3	0.5	50	High	3	High	NEG
262	Validation	(57ng/ul)	30.05	32.64	37.82		38.71	31.76	39.3	38.02	35.75	35.58		38.47	38.77	37.34	37.7		36.83	36.4	37.13	37.93	36.65	38.94	1937-02-27	70	1998-12-20	ductal	1	T2	2	23	8	0	pN0	0		1	80	2	NEG	3	0.35	35	High	3	High	X
263	Validation	(248ng/ul)	23.4	24.45	30.42		32.69	24.17	31.25	32.24	32.45	30.99	35.29	30.16	30.05	31.8	31.33	28.12	33.52	30.69	30.88		31.58	34.09	1935-05-31	66	2001-12-19	ductal	1	T2	2	30	59	56	pN3	3		2	NEG	2	NEG	2	0.3	30	High	3	High	POS
264	Validation	(725ng/ul)	22.32	22.28	28.92		30.78	21.82	29.61	28.55	28.95	30.26	31.29	26.78	29.67	29.07	27.54	25.92	31.85	29.33	30.26	37.79	28.55	32.76	1939-01-11	63	2004-09-07	ductal	1	T1	1	15	21	2	pN1a	1		2	NEG	2	NEG	3	0.3	30	High	3	High	NEG
265	Validation	(150ng/ul)	27.84	24.74	33.09		30.55	23.64	32.6	32.04	32.48	29.98	34.65	30.39	30.19	33.43	31.72	30.89	34.85	29.69	31.25		31.14	33.42	1925-01-16	77	2001-11-19	duttulo-tubular		T1	1	10	22	0	pN0	0		1	90	1	90	1	0.01	1	Low	1	Low	NEG
266	Validation	(238ng/ul)	25.58	25.37	31.38	32.14	32.74	25.21	30.89	31.94	33.37	28.9	34.54	29.54	30.66	32.72	31.69	29.33	34.53	30.19	31.43		32.13	34.33	1929-08-04	85	2003-11-24	tubulo-lobular		T3	3	55	15	0	pN0	0		1	80	1	60	2	0.25	25	High	3	Intermediate	NEG
267	Validation	(355ng/ul)	26.17	23.6	29.37		31.35	23.57	30.07	31.16	31.41	28.84	33.91	28.39	31.94	30.99	29.3	26.97	31.98	32.22	28.91	32.66	30.77	31.84	1924-10-26	77	2001-11-29	ductal	1	T1	1	12	14	0	pN0	0		1	90	1	70	2	0.15	15	High	3	Intermediate	NEG
268	Validation	(336ng/ul)	23.35	23.29	28.46	32.8	32.59	23.25	29.86	31.82	31.55	30.7	33.12	28.18	28.32	30.63	28.73	27.64	31.71	30.7	31.03	33.21	29.93	31.96	1931-04-04	77	2008-08-22	ductal	1	T2	2	27	23	15	pN3	3		2	NEG	2	NEG	3	X	X	X	0	X	POS
269	Validation	(265ng/ul)	23.43	25.31	31.05		31.78	26.07	30.9	35.04	35.79	35.87		30.15	30.42	33.2	31.46	31.25	36.06	34.52	34.06	36.21	34.05	34.41	1945-06-22	46	1991-04-24	ductal	1	T1	1	14	10	1	pN1a	1		1	70	1	70	X	X	X	X	0	X	X
270	Validation	(252ng/ul)	31.83	33.09	39.57		37.97		39.58	32.21							37.47	37.34		34.53	37.14		38.09	37.42	1923-08-27	80	2003-11-06	ductal	1	T2	2	25	2	0	pN0	0		1	60	1	40	2	0.15	15	High	3	Intermediate	NEG
271	Validation	(198ng/ul)	26.53	27.68	33.42		35.08	26.93	35.58	34.37	35.19	36.43	36.5	37.36	33.67	31.32	37.35	34.67	31.97	36.24	30.48	32.64		36.71	1929-04-01	74	2002-09-12	ductal	1	T2	2	24	25	0	pN0	0		1	85	2	NEG	2	0.1	10	Low	1	Low	POS
272	Validation	(66ng/ul)	24.37	25.33	30.66		32	25.31	30.9	33.12	32.95	30.57	34.58	31.05	29.55	34.16	33.18	29.07	33.62	31.16	31.04		32.93		1946-05-27	56	2002-11-27	ductal	1	T1	1	20	13	0	pN0	0		1	80	2	NEG	2	0.2	20	High	3	Intermediate	POS
273	Validation	(116ng/ul)	24.42	27.06	32.47		33.45	25.3	33.79	34.01	32.71	31.97		31.53	33.31	33.62	34.35	31.64		30.28	30.62	38.88	33.61	36.64	1958-06-22	45	2003-01-16	lobular	2	T2	2	25	12	2	pN1a	1		1	70	1	40	2	0.02	2	Low	1	Low	NEG
274	Validation	(178ng/ul)	27.47	28.95	32.39		34.84	28.31	33.94		31.62		32.42	34.18	33.15		34.18	31.63		34.7	33.14		34.11		1942-11-08	53	1995-06-09	ductal	1	T2	2	25	24	3	pN1a	1		1	90	1	40	X	X	X	X	0	X	NEG
275	Validation	(237ng/ul)	24.24	26.84	31.99		35.45	25.44	32.12	33.31	34.59	31.02	36.31	31.11	31.75	34.06	32.44	31.69	37.37	33.14	33.32	35.01	32.18	34.6	1943-09-24	65	2008-08-14	ductal	1	T2	2	30	14	2	pN1a	1		2	NEG	2	NEG	2	0.4	40	High	3	High	POS
276	Validation	(75ng/ul)	23.41	24.95	30.01		32.28	23.77	31.84	31.81	31.66	31.44		29.72	30.8	32.68	30.57	27.77	33.22	30.46	31.3	34.53	31.71	33.88	1940-03-20	69	2008-01-29	ductal	1	T1	1	5	27	25	pN3	3		2	NEG	2	NEG	3	0.7	70	High	3	High	POS
277	Validation	(50ng/ul)	29.12	29.14	33.85		35.55	28.99	35.9	35.82	35.75	37.56		34.6	34.44	37.08	36.46	34.19		34.15	33.93				1931-09-21	73	2004-08-19	papillary		T2	2	40	8	5	pN2	2		1	70	2	NEG	2	0.2	20	High	3	Intermediate	NEG
[truncated: 3 more columns]
